# Supplementary material
Source: PubMed Central journal article supplement (PMC4580500)

**5a: (S)-amino(2-(3-(4-iodophenyl)-1,2,4-oxadiazol-5-yl)pyrrolidin-1-yl)methaniminium chloride**

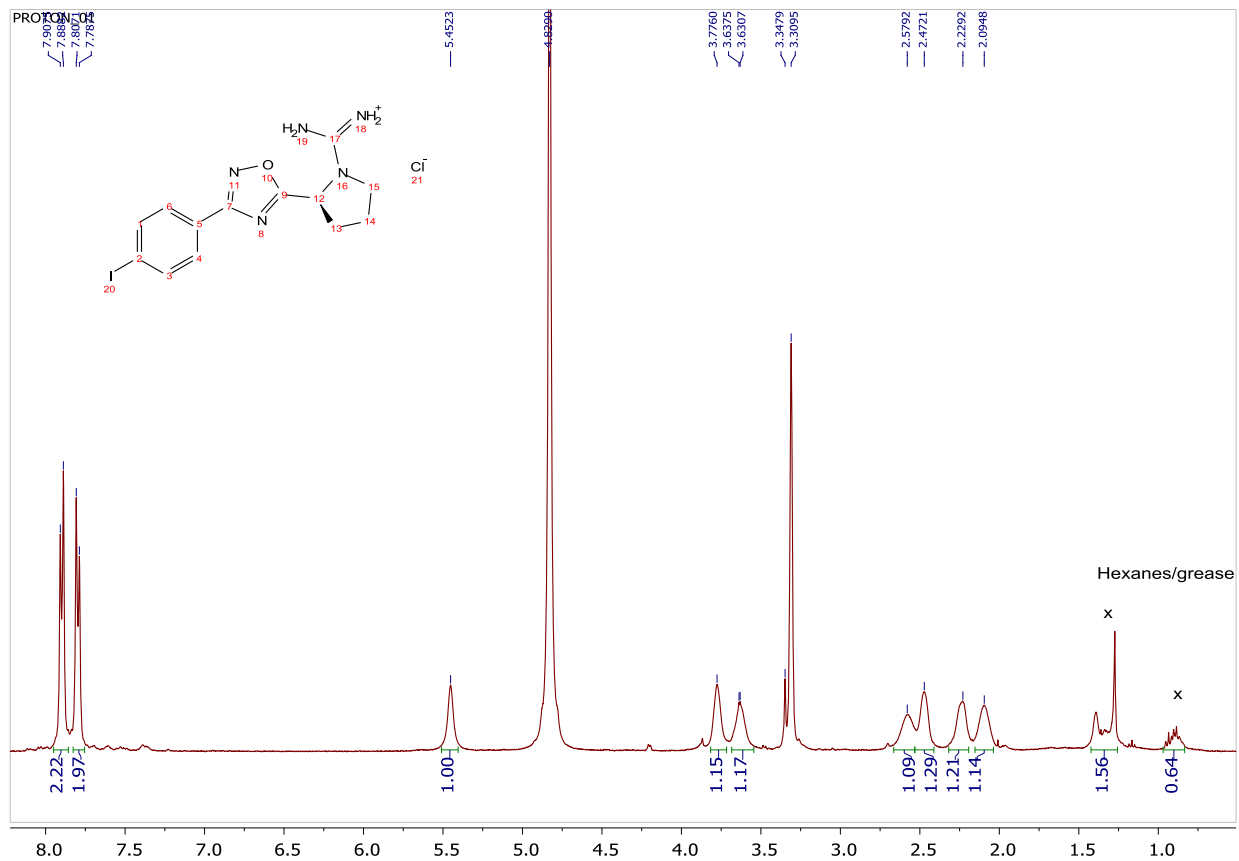

**5a: (S)-amino(2-(3-(4-iodophenyl)-1,2,4-oxadiazol-5-yl)pyrrolidin-1-yl)methaniminium chloride**

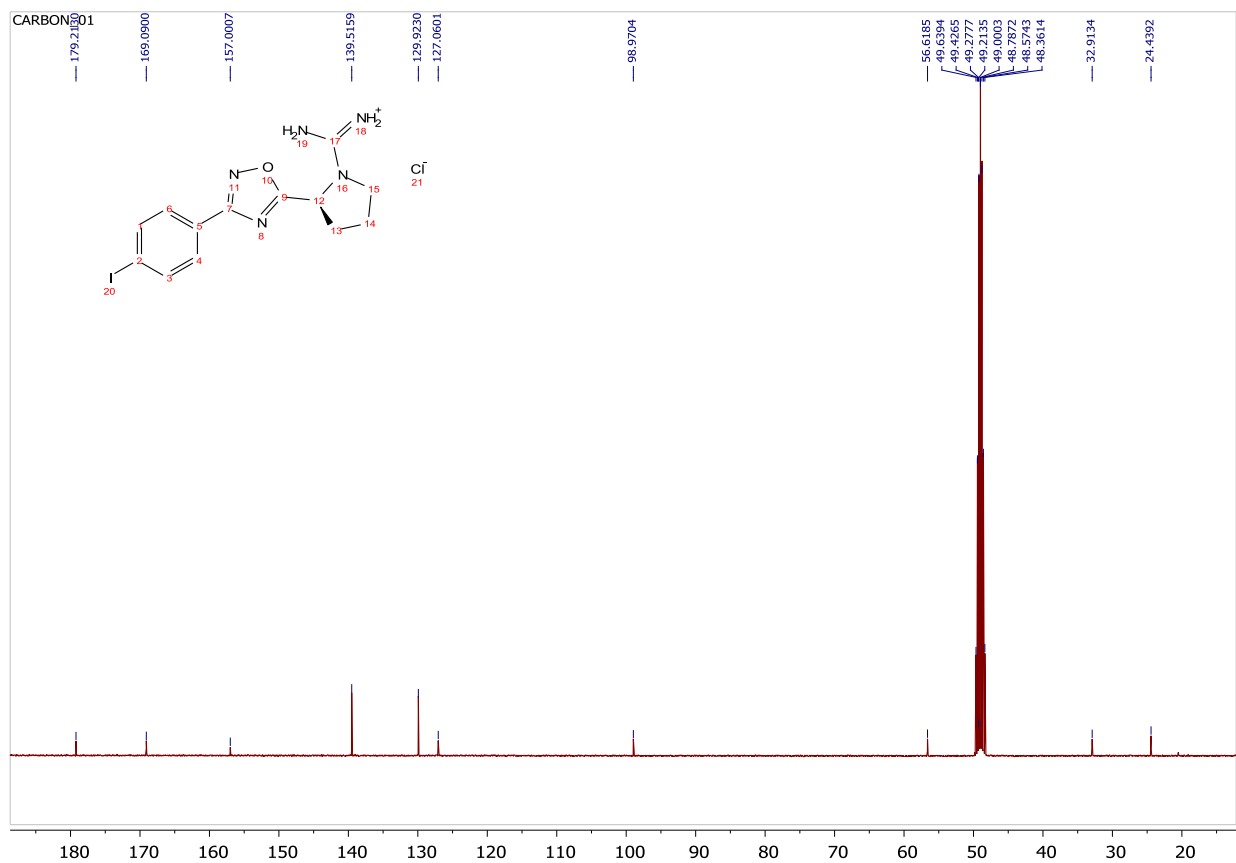

**5d: (S)-amino(2-(3-(4-tetradecylphenyl)-1,2,4-oxadiazol-5-yl)pyrrolidin-1-yl)methaniminium chloride**

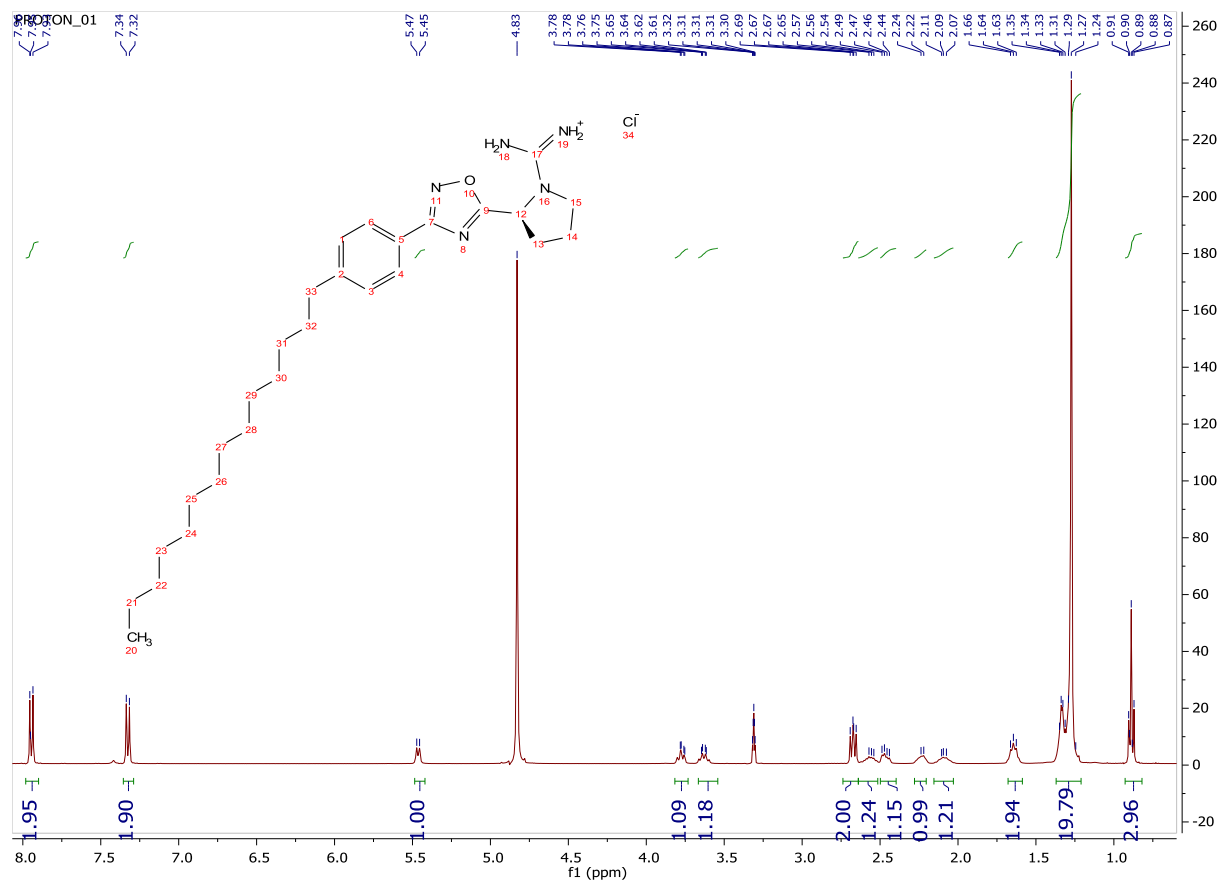

**5d: (S)-amino(2-(3-(4-tetradecylphenyl)-1,2,4-oxadiazol-5-yl)pyrrolidin-1-yl)methaniminium chloride**

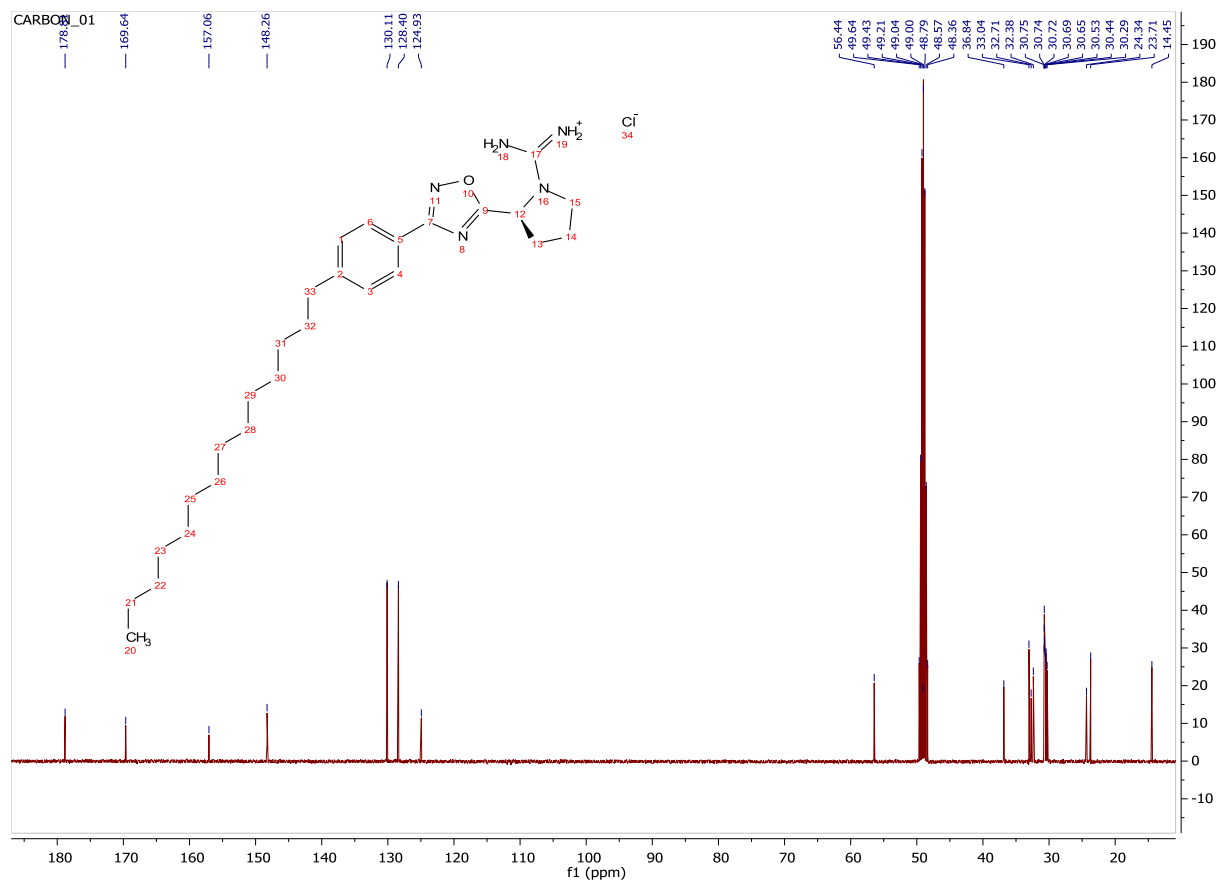

**5e: (S)-amino(2-(3-(4-phenethylphenyl)-1,2,4-oxadiazol-5-yl)pyrrolidin-1-yl)methaniminium chloride**

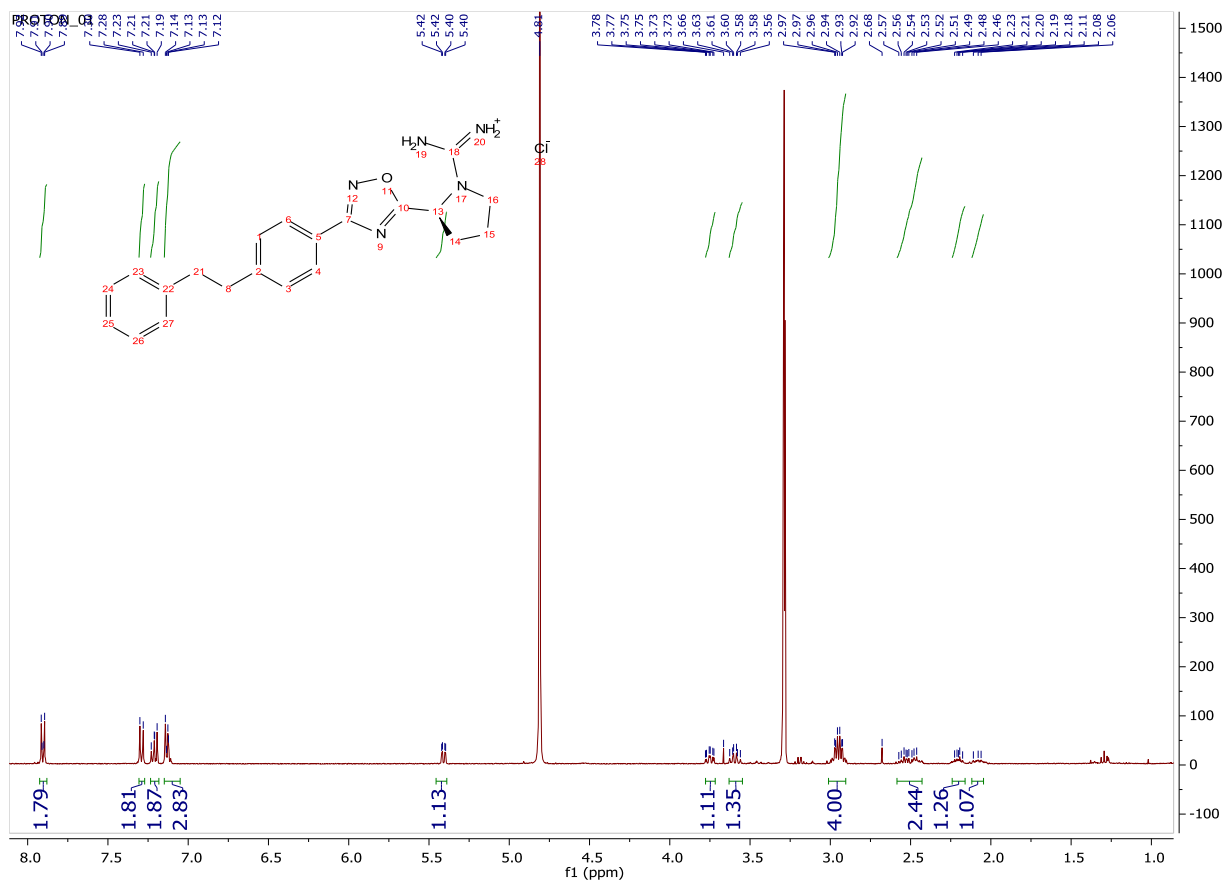

# 5e: (S)-amino(2-(3-(4-phenethylphenyl)-1,2,4-oxadiazol-5-yl)pyrrolidin-1-yl)methaniminium chloride

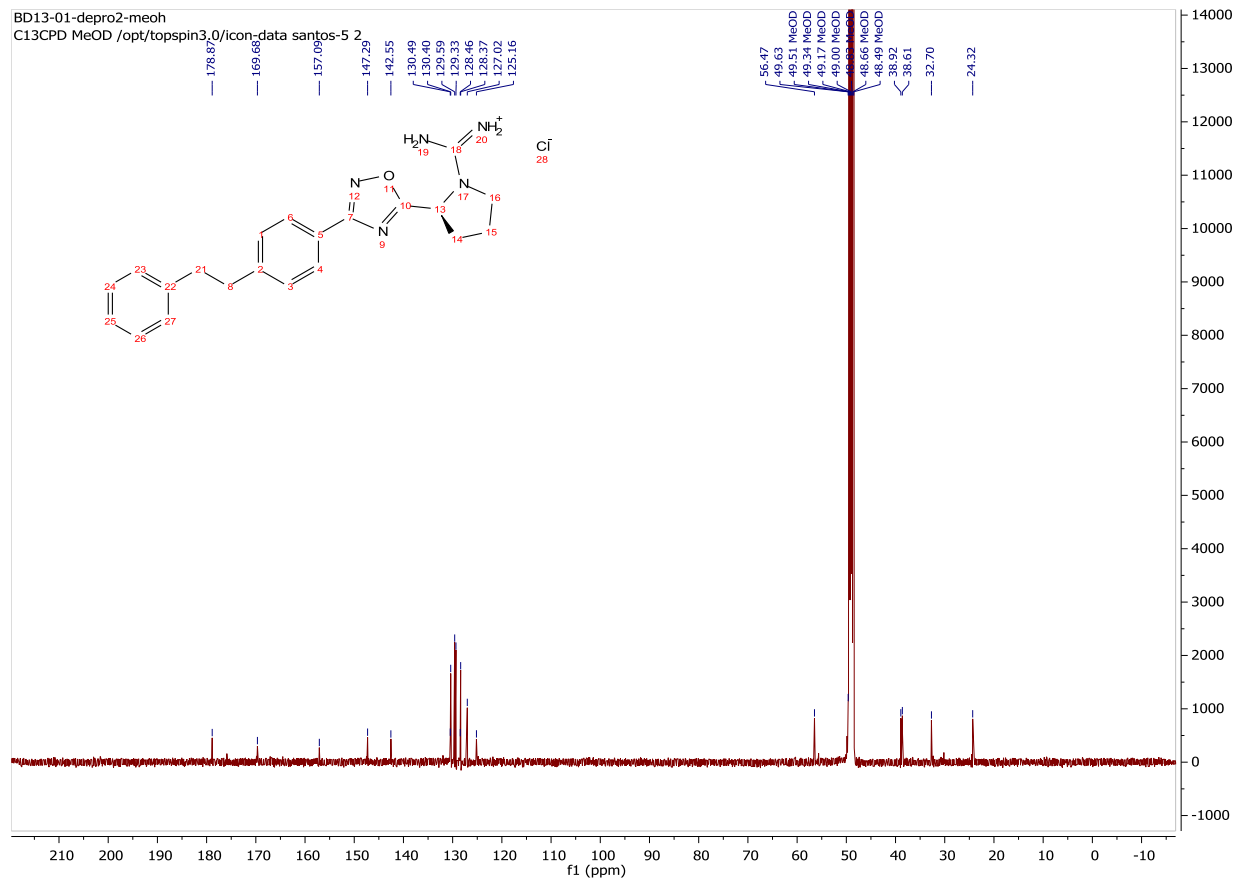

**5f: (S)-amino(2-(3-(4-hexylphenyl)-1,2,4-oxadiazol-5-yl)pyrrolidin-1-yl)methaniminium chloride**

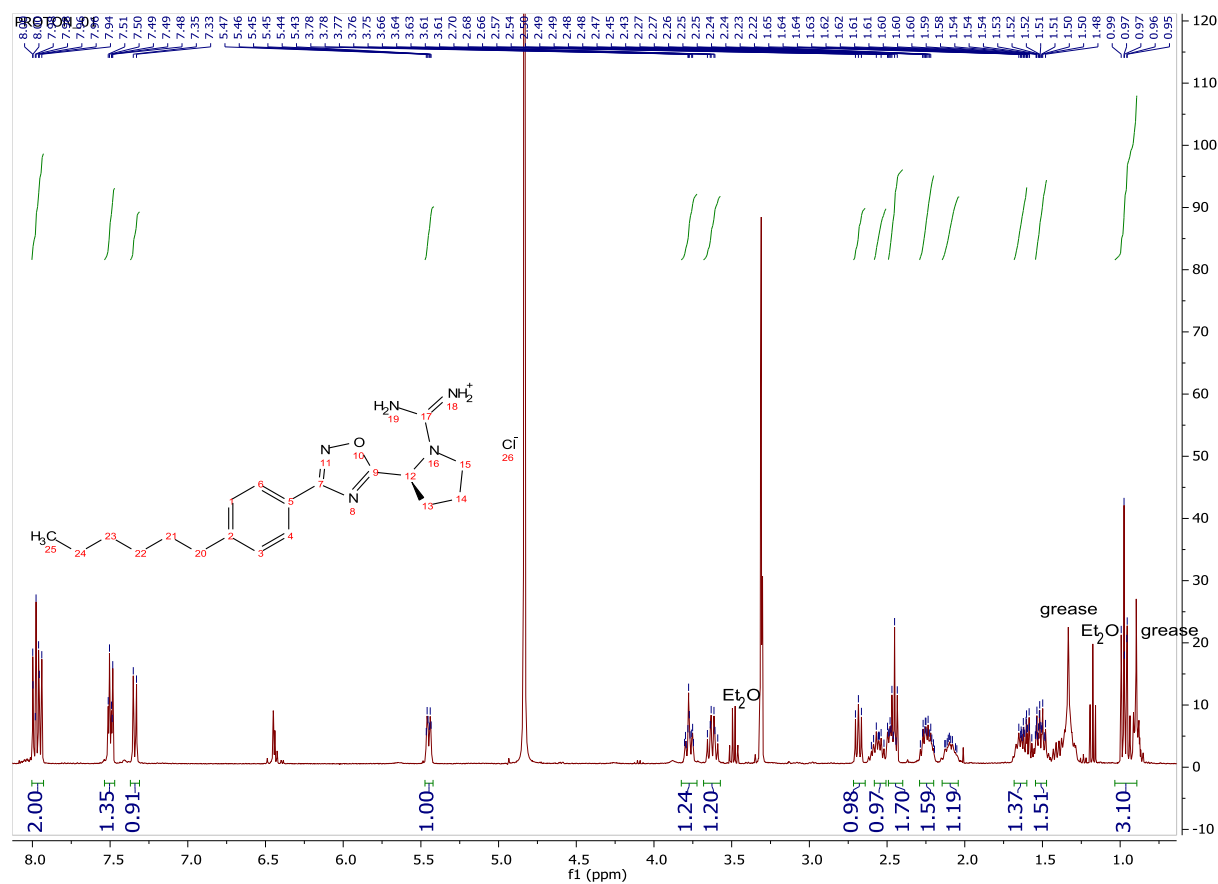

**5f: (S)-amino(2-(3-(4-hexylphenyl)-1,2,4-oxadiazol-5-yl)pyrrolidin-1-yl)methaniminium chloride**

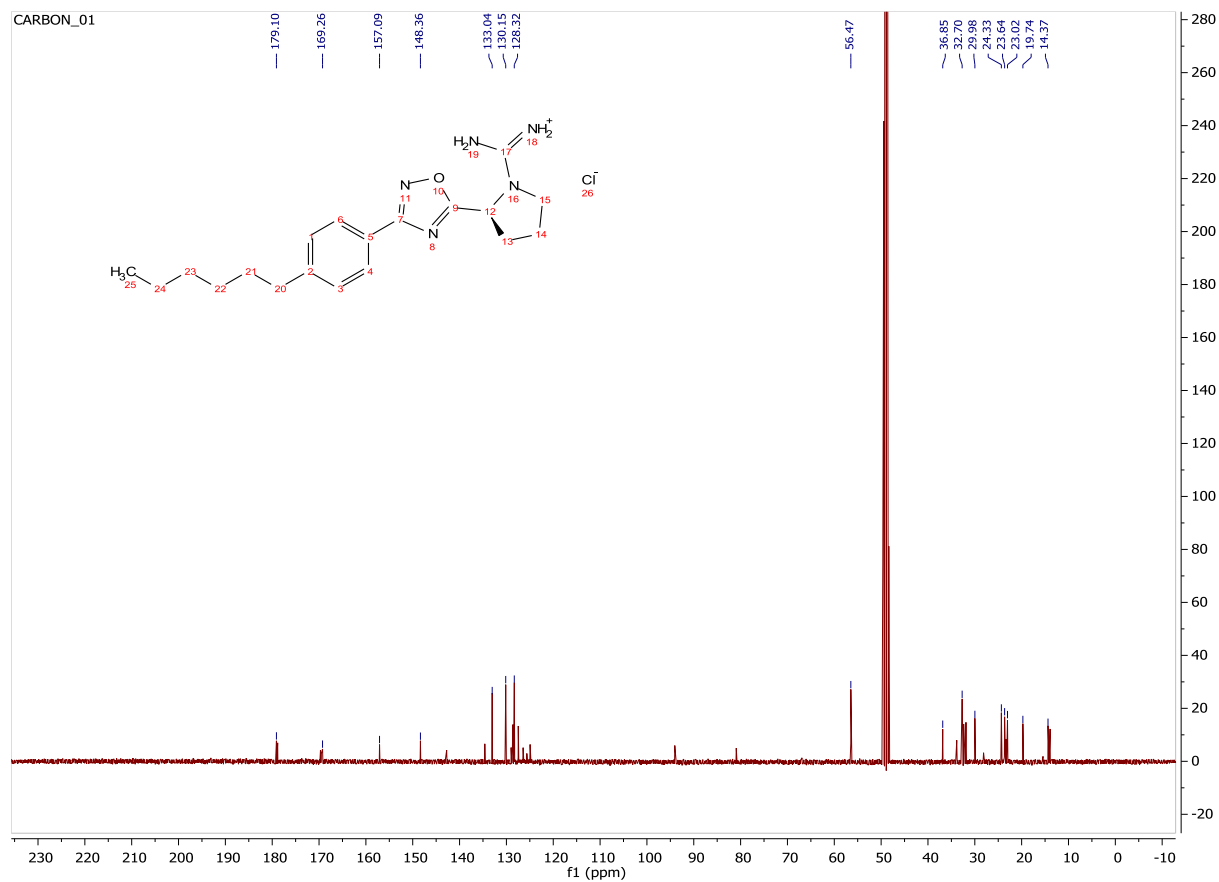



# 5g: (S)-amino(2-(3-(4-decylphenyl)-1,2,4-oxadiazol-5-yl)pyrrolidin-1-yl)methaniminium chloride

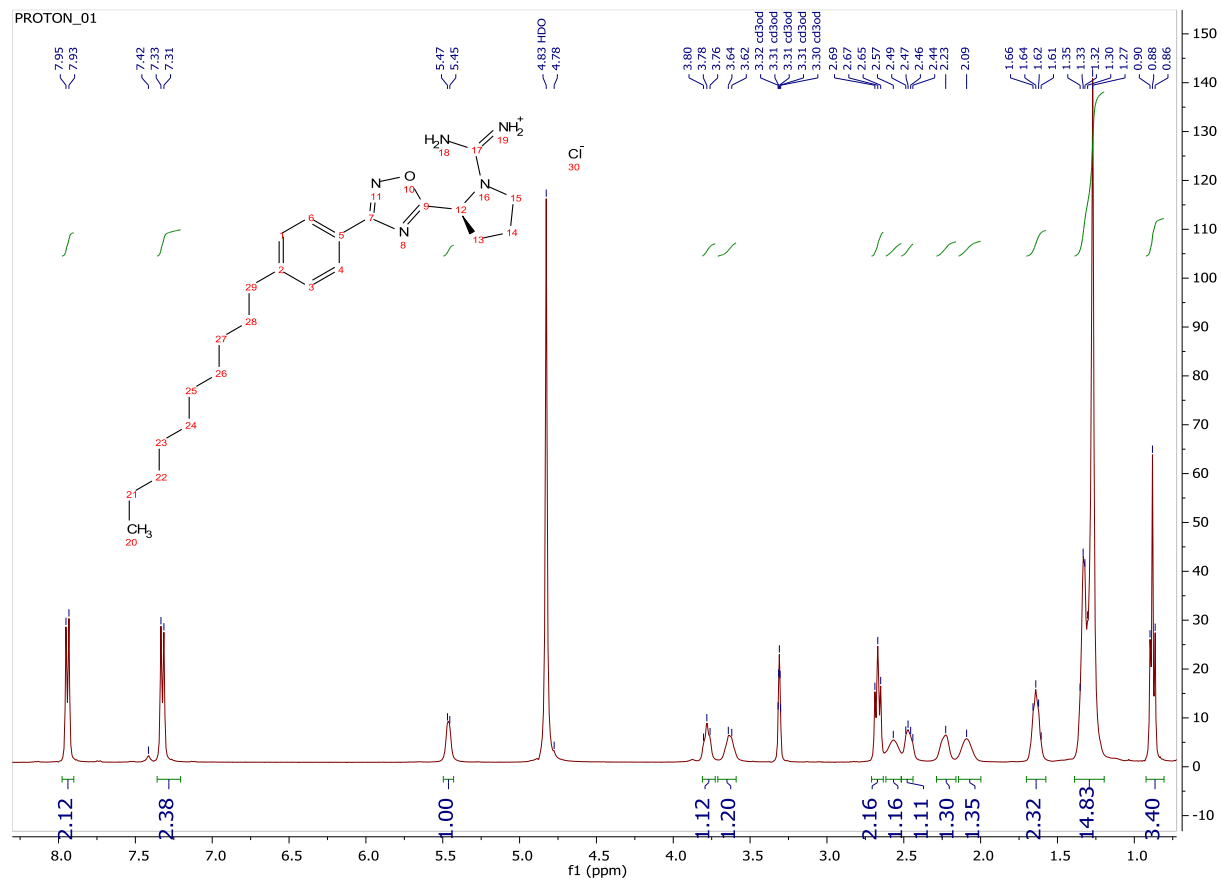

**5g: (S)-amino(2-(3-(4-decylphenyl)-1,2,4-oxadiazol-5-yl)pyrrolidin-1-yl)methaniminium chloride**

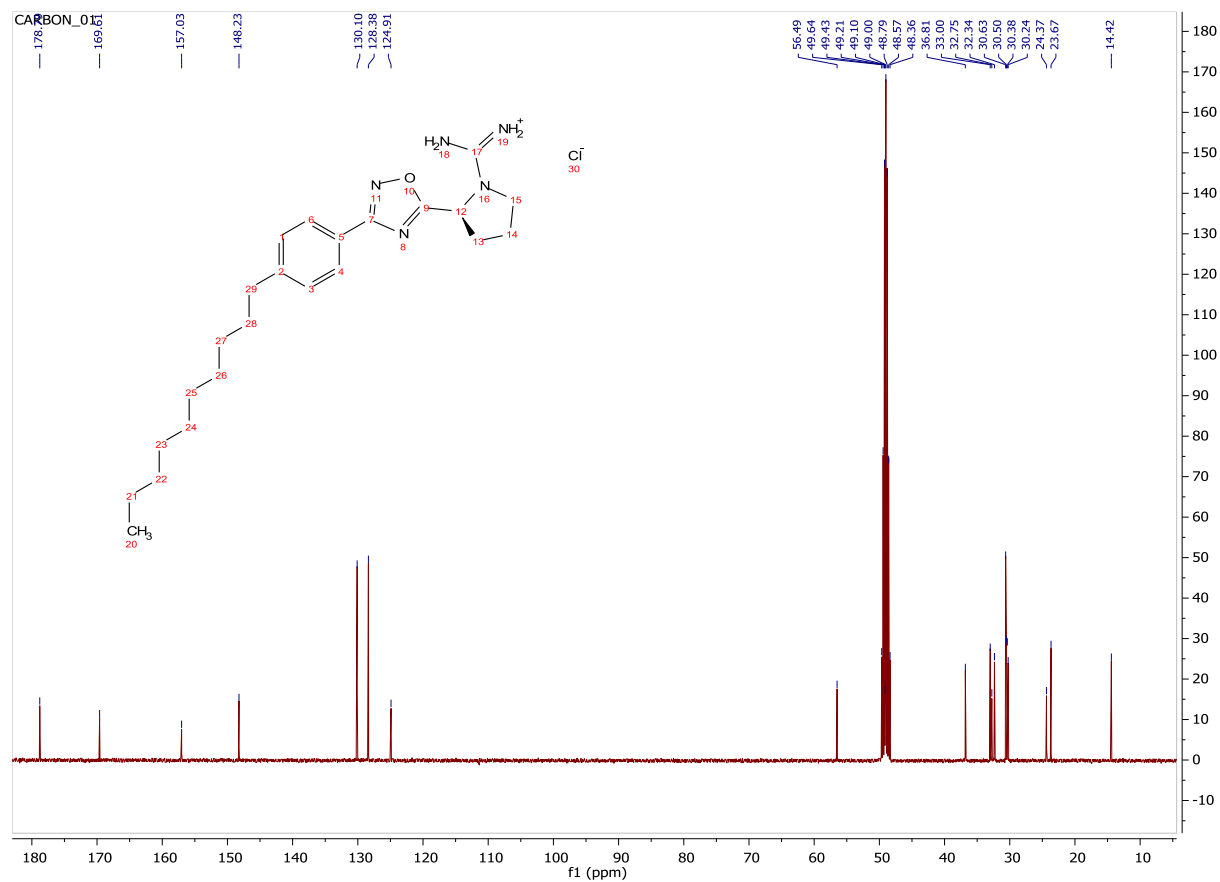

**5h: (S)-amino(2-(3-(4-dodecylphenyl)-1,2,4-oxadiazol-5-yl)pyrrolidin-1-yl)methaniminium chloride**

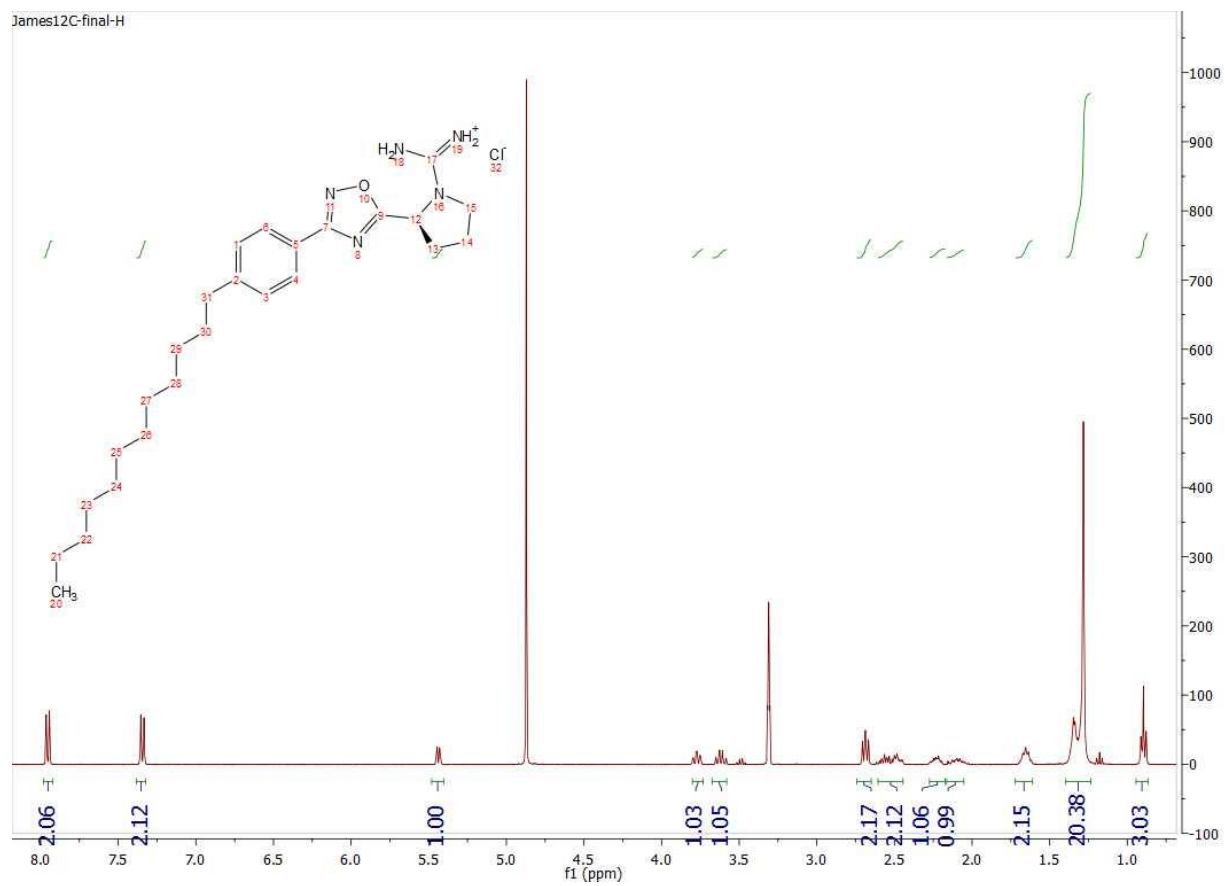

# 5h: (S)-amino(2-(3-(4-dodecylphenyl)-1,2,4-oxadiazol-5-yl)pyrrolidin-1-yl)methaniminium chloride

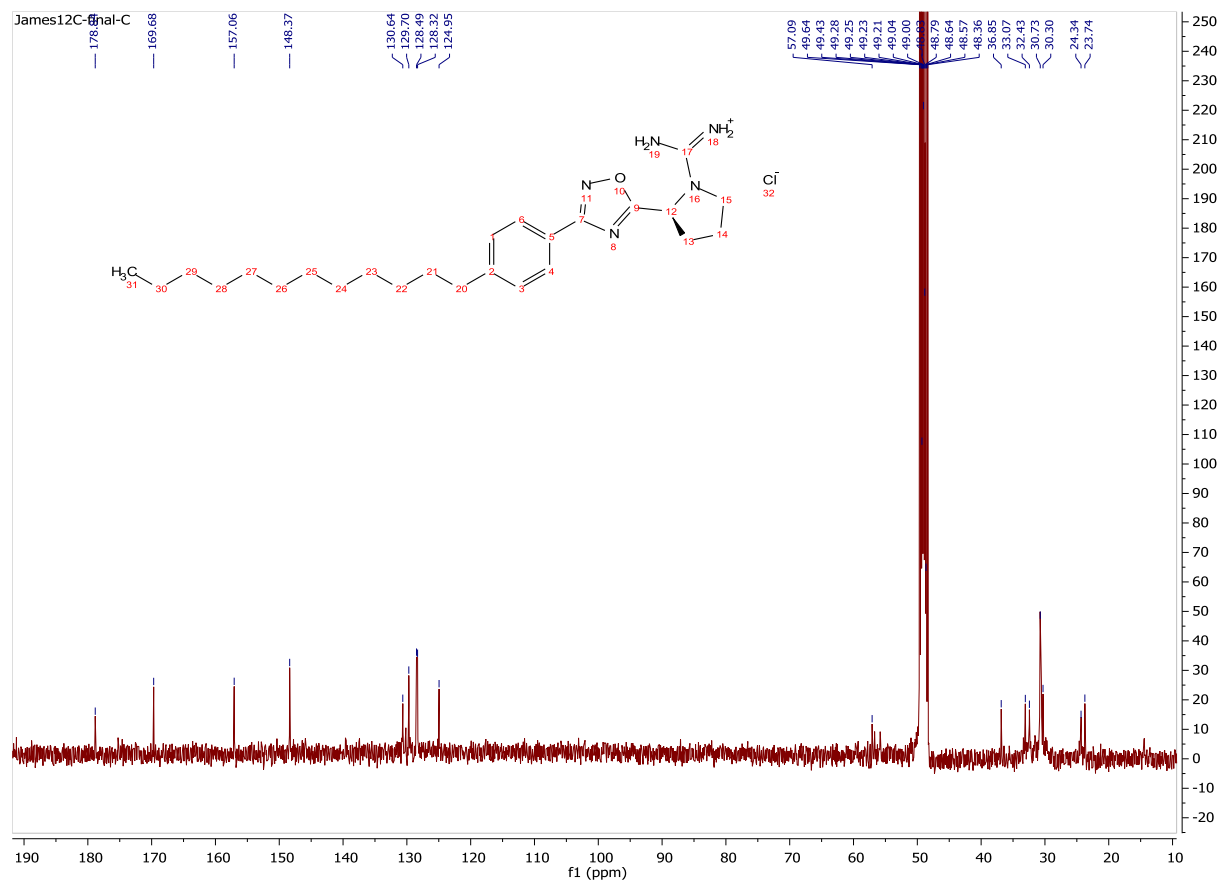

**7c: (S)-2-(3-([1,1'-biphenyl]-4-yl)-1,2,4-oxadiazol-5-yl)azetidin-1-yl(amino) methaniminium chloride**

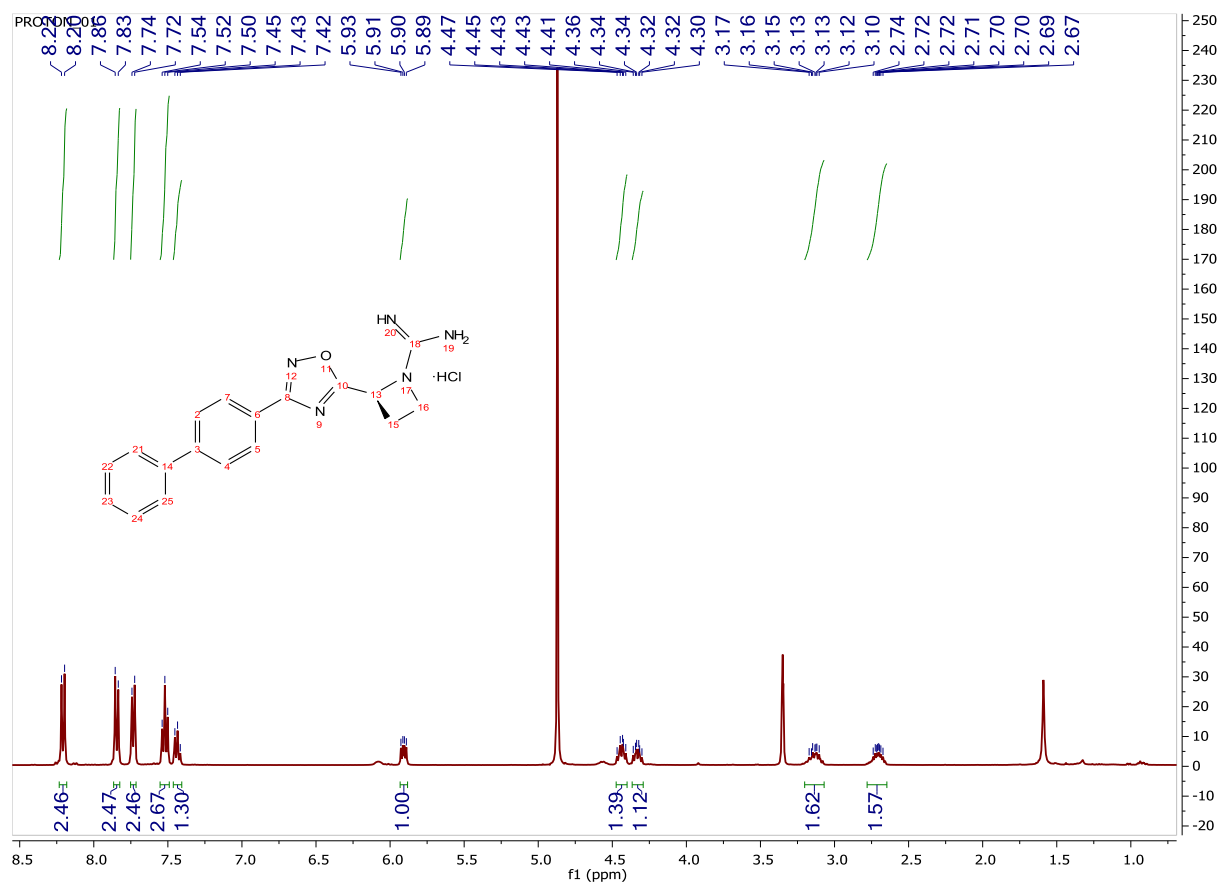

**7c: (S)-2-(3-([1,1'-biphenyl]-4-yl)-1,2,4-oxadiazol-5-yl)azetidin-1-yl(amino) methaniminium chloride**

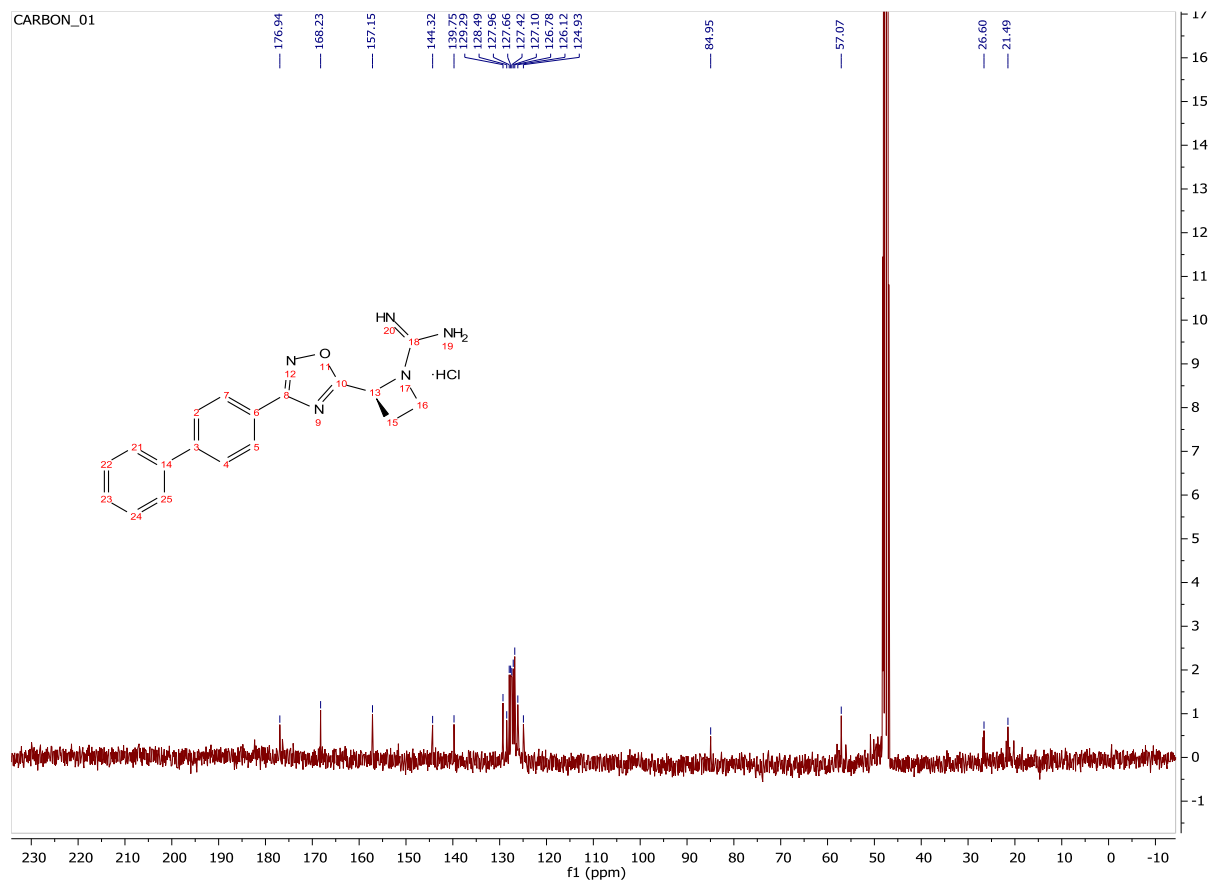

# 7d: (S)-amino(2-(3-(4-morpholinophenyl)-1,2,4-oxadiazol-5-yl)azetidin-1-yl)methaniminium chloride

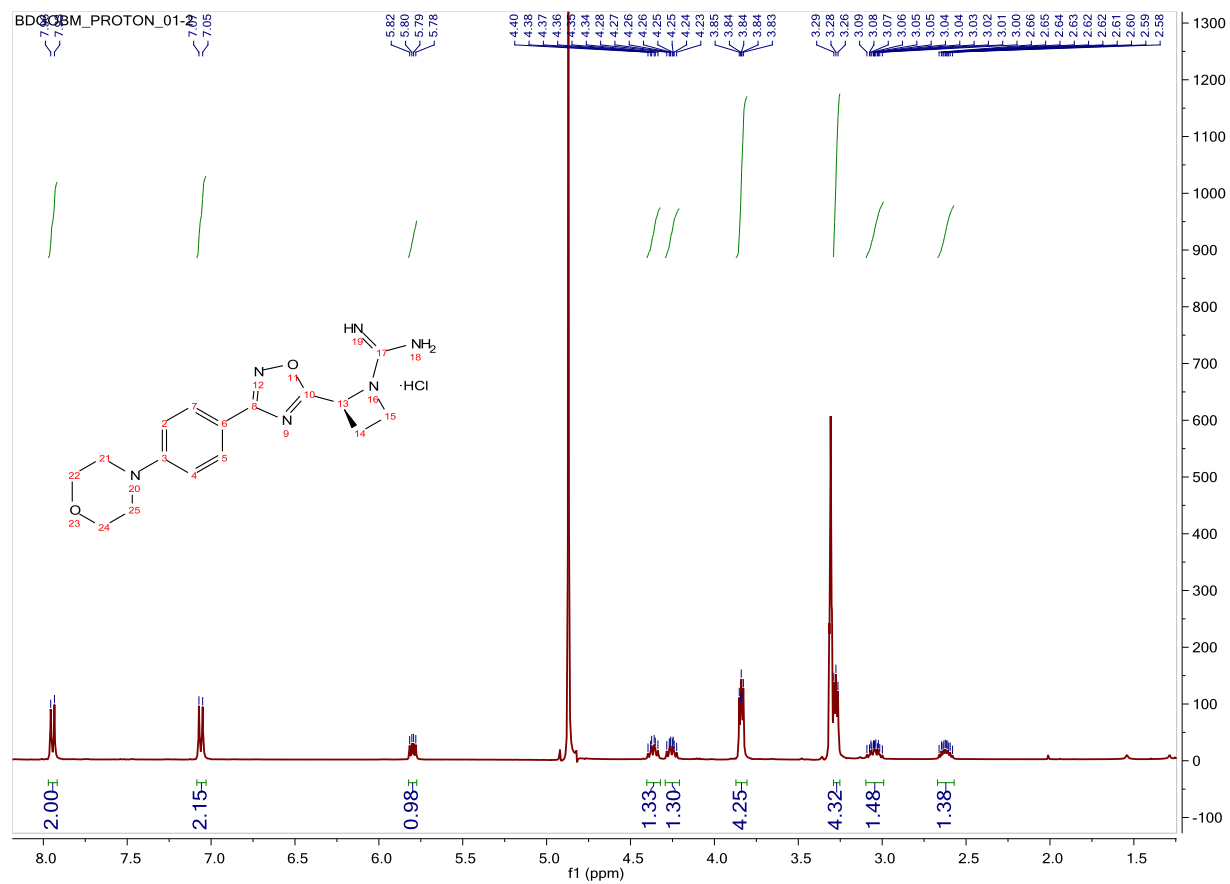

**7d: (S)-amino(2-(3-(4-morpholinophenyl)-1,2,4-oxadiazol-5-yl)azetidin-1-yl)methaniminium chloride**

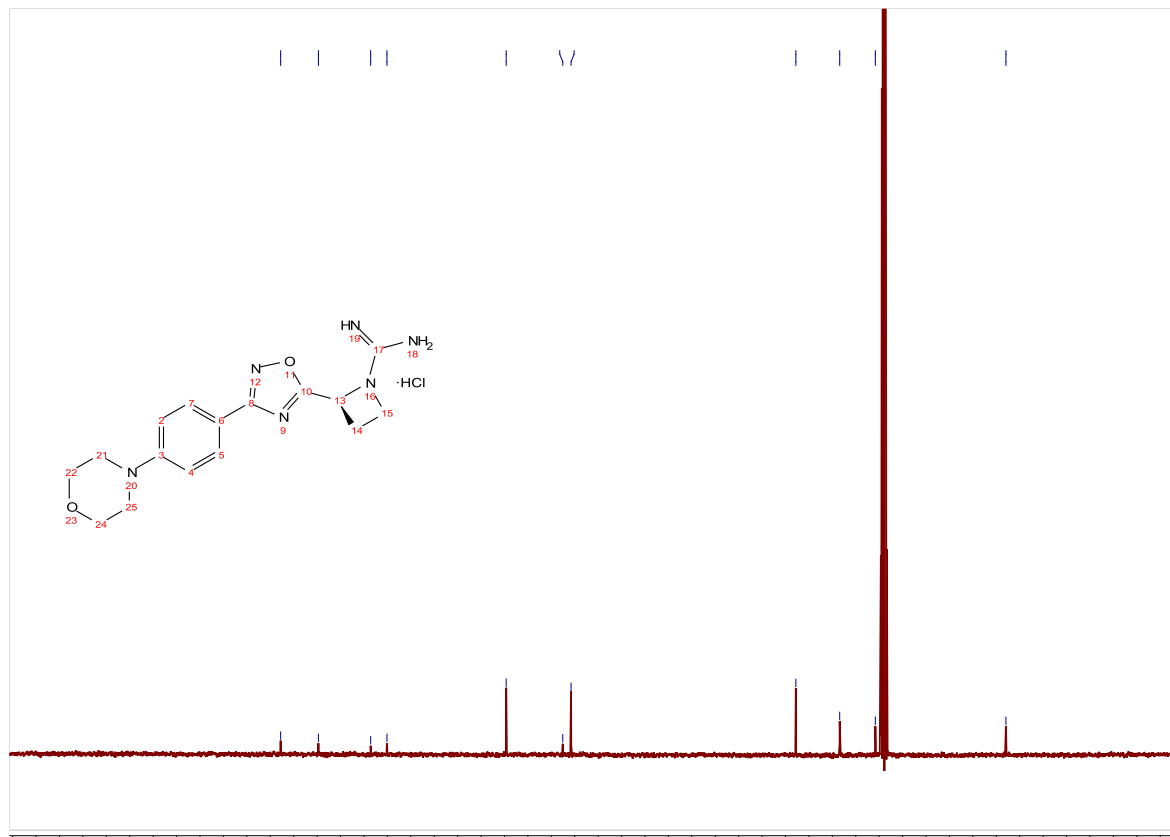



**7e: (S)-4-(4-(5-(1-(amino(iminio)methyl)azetidin-2-yl)-1,2,4-oxadiazol-3-yl)phenyl)-1-methylpiperazin-1-ium chloride**

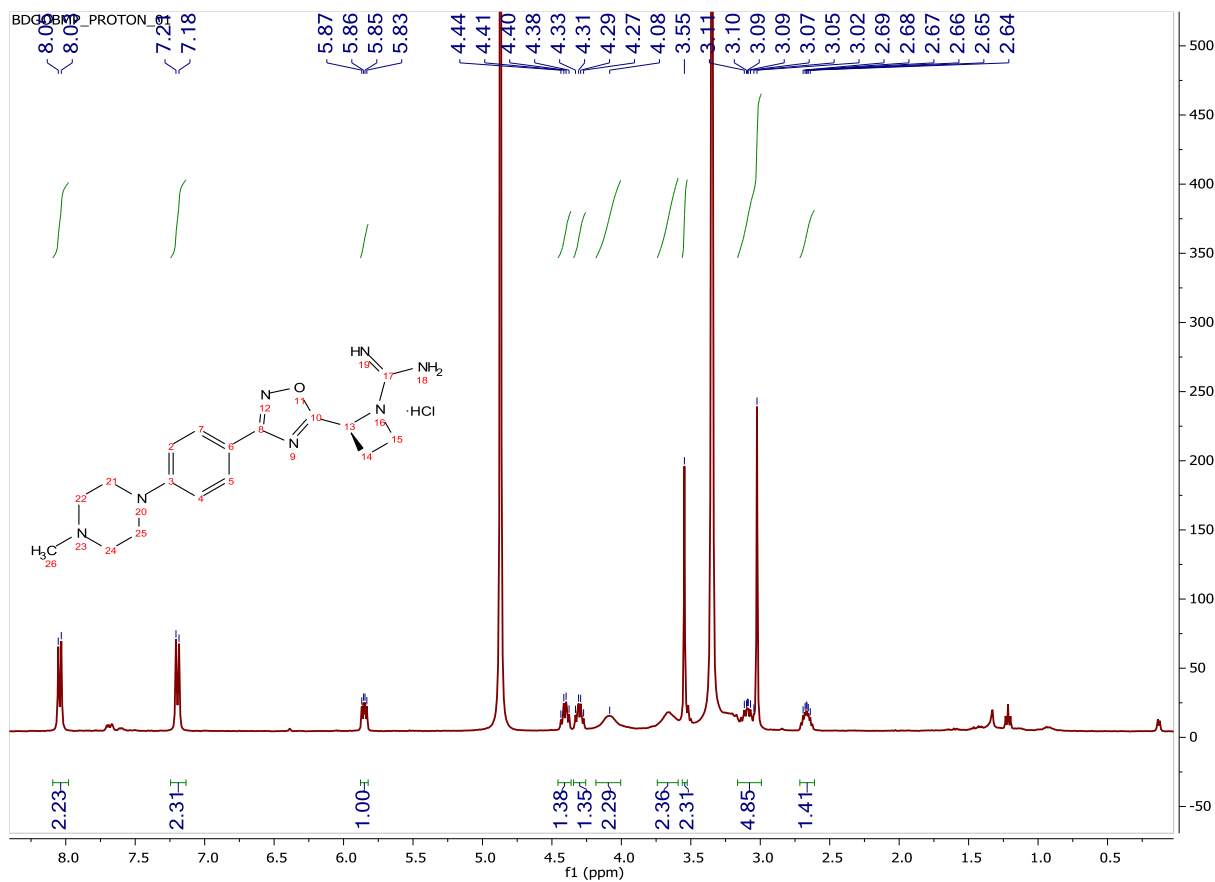

# 7e: (S)-4-(4-(5-(1-(amino(iminio)methyl)azetidin-2-yl)-1,2,4-oxadiazol-3-yl)phenyl)-1-methylpiperazin-1-ium chloride

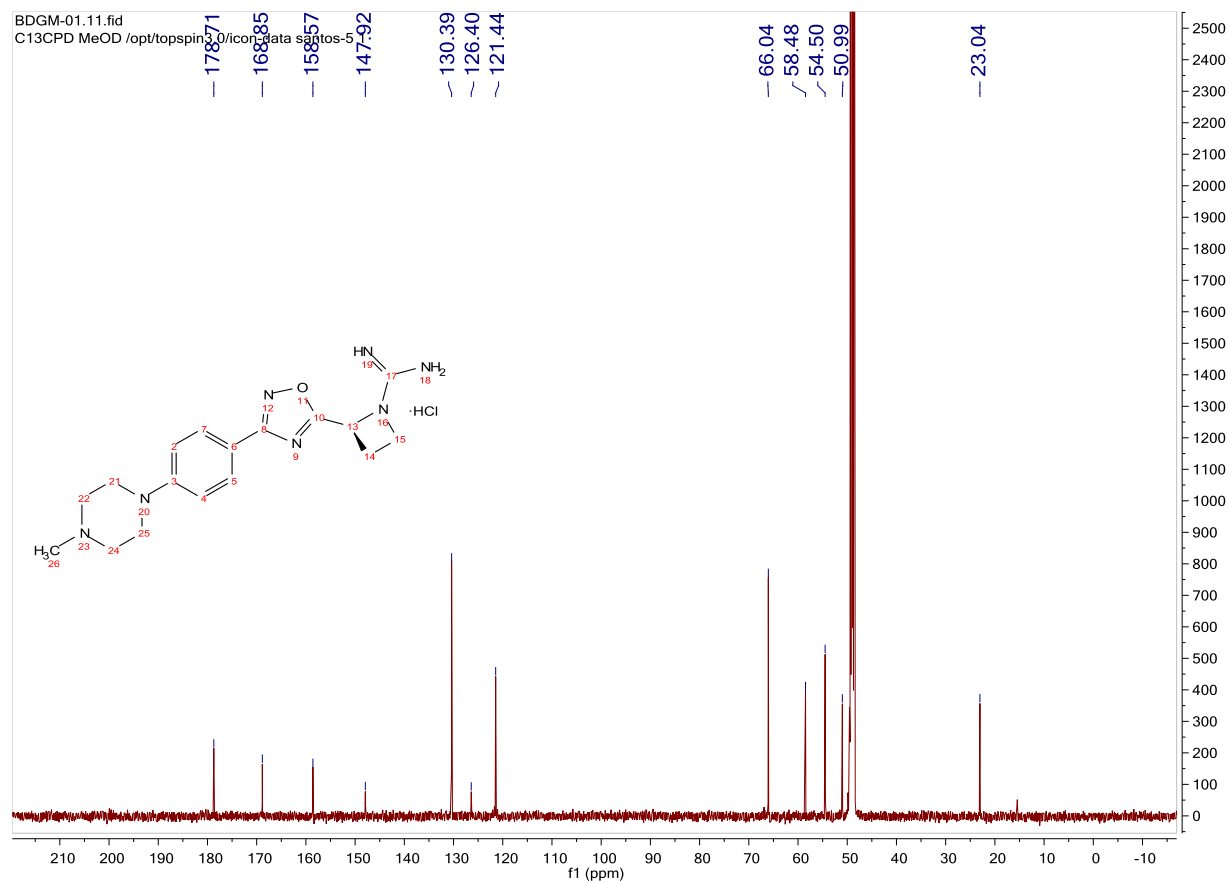

**7f: (S)-amino(2-(3-(4-hexylphenyl)-1,2,4-oxadiazol-5-yl)azetidin-1-yl)methaniminium chloride**

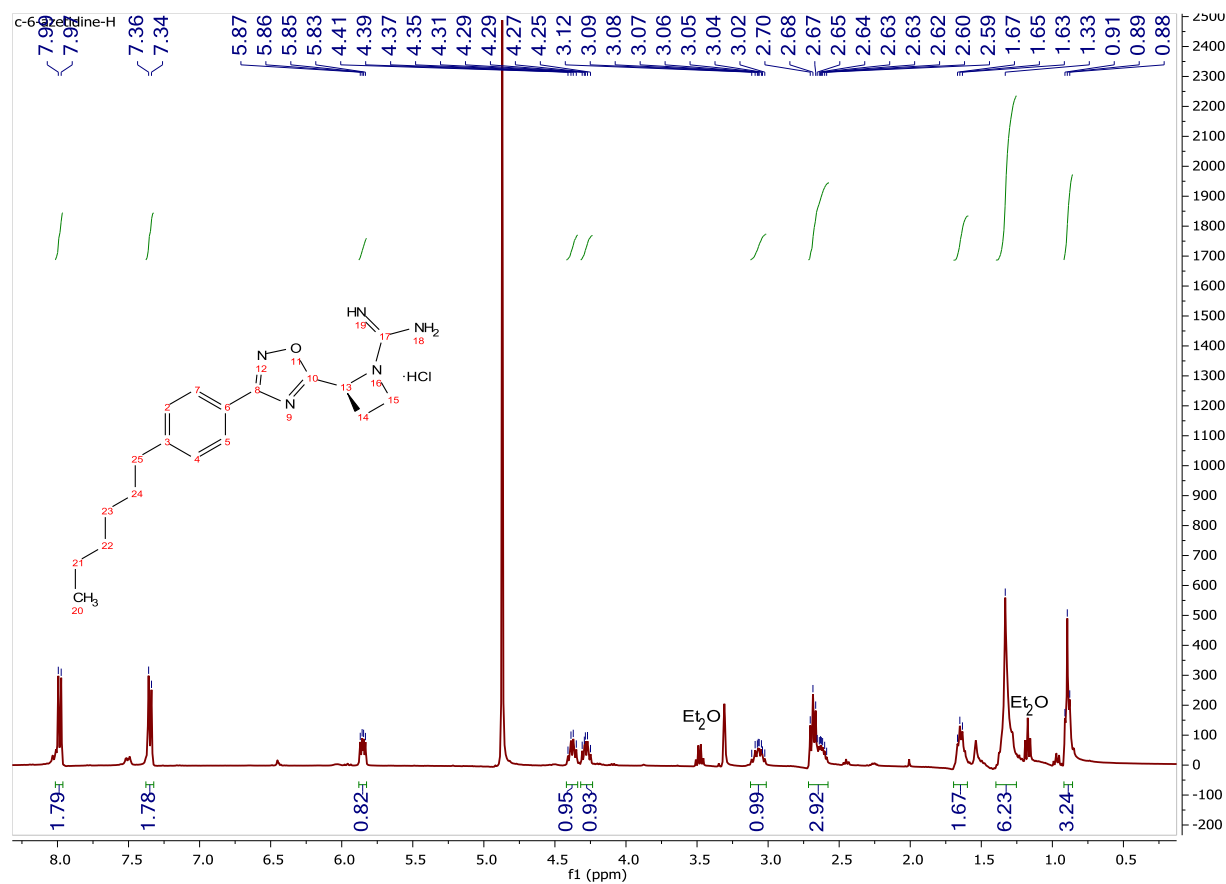

**7f: (S)-amino(2-(3-(4-hexylphenyl)-1,2,4-oxadiazol-5-yl)azetidin-1-yl)methaniminium chloride**

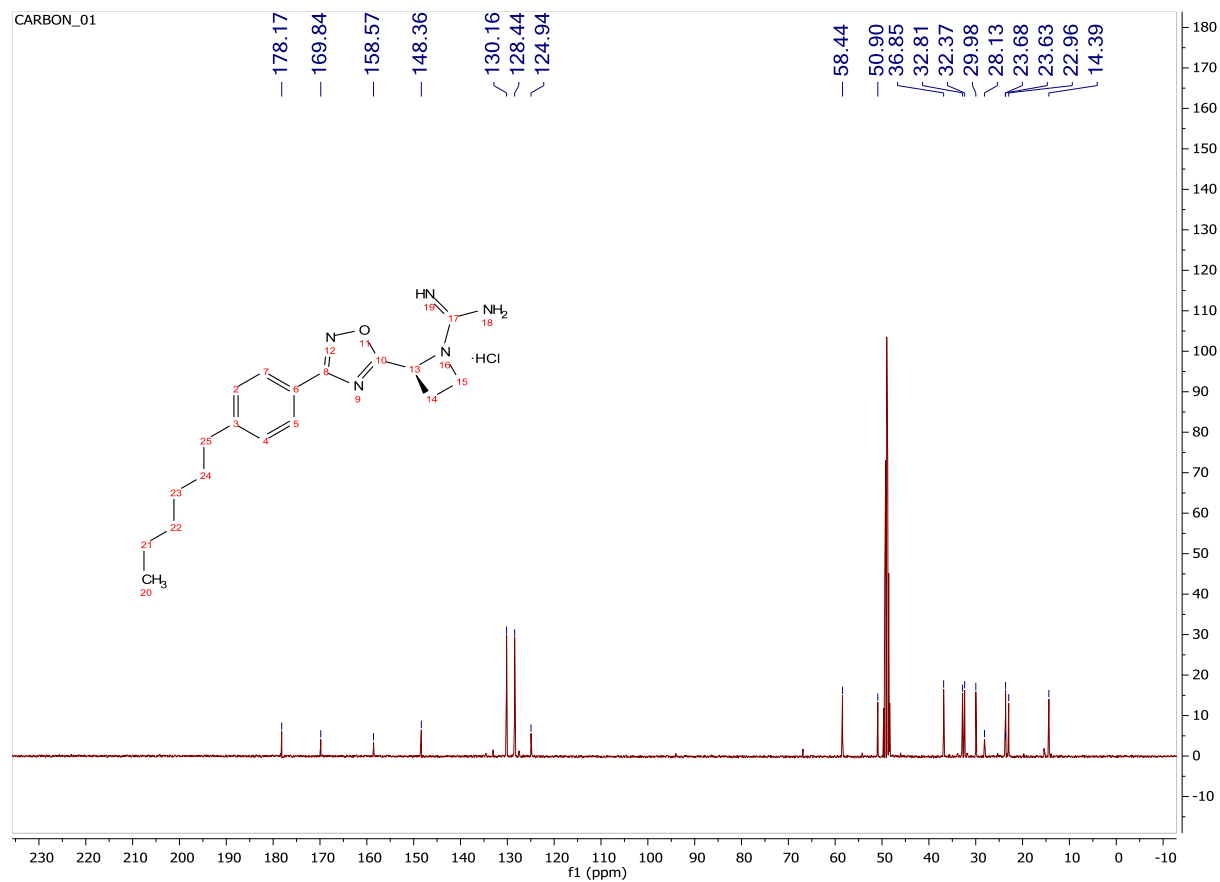

**7g: (S)-amino(2-(3-(4-decylphenyl)-1,2,4-oxadiazol-5-yl)azetidin-1-yl)methaniminium chloride**

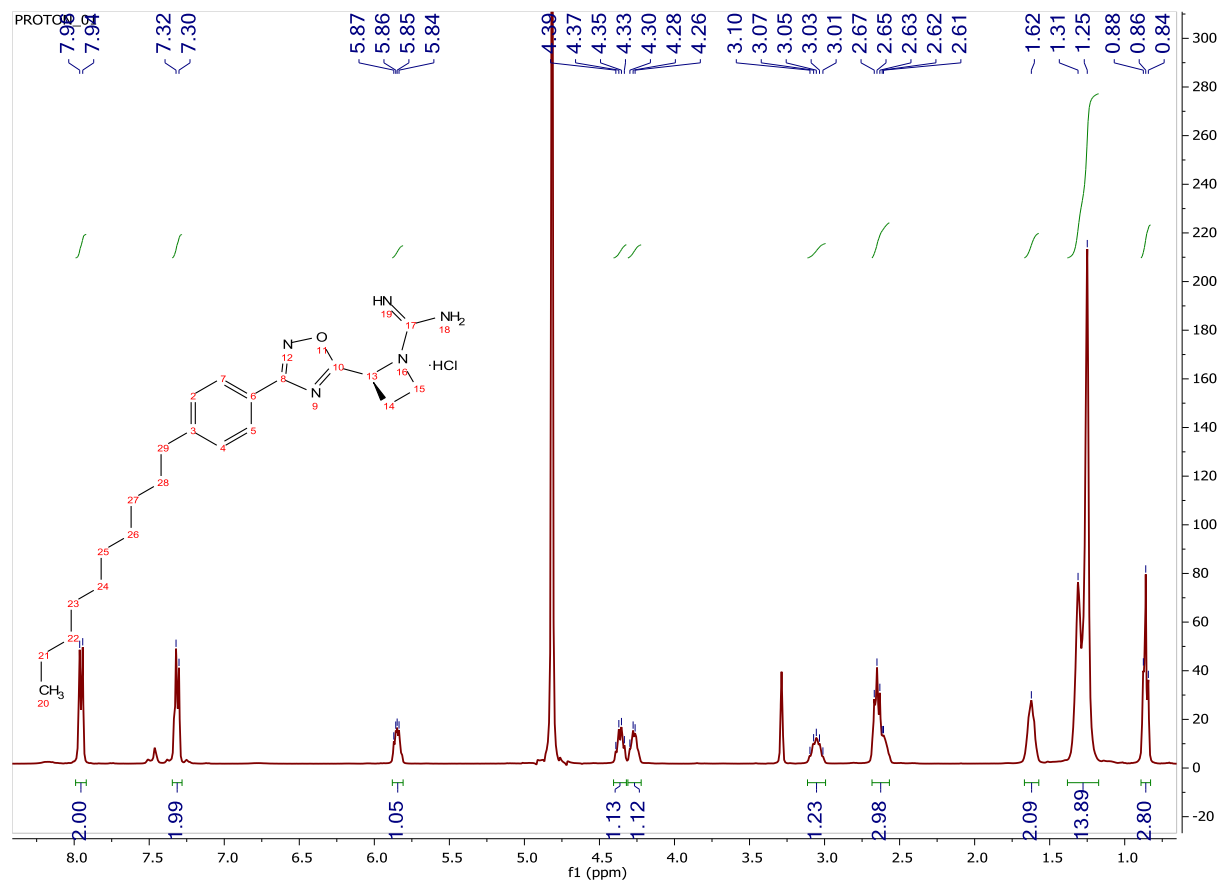

**7g: (S)-amino(2-(3-(4-decylphenyl)-1,2,4-oxadiazol-5-yl)azetidin-1-yl)methaniminium chloride**

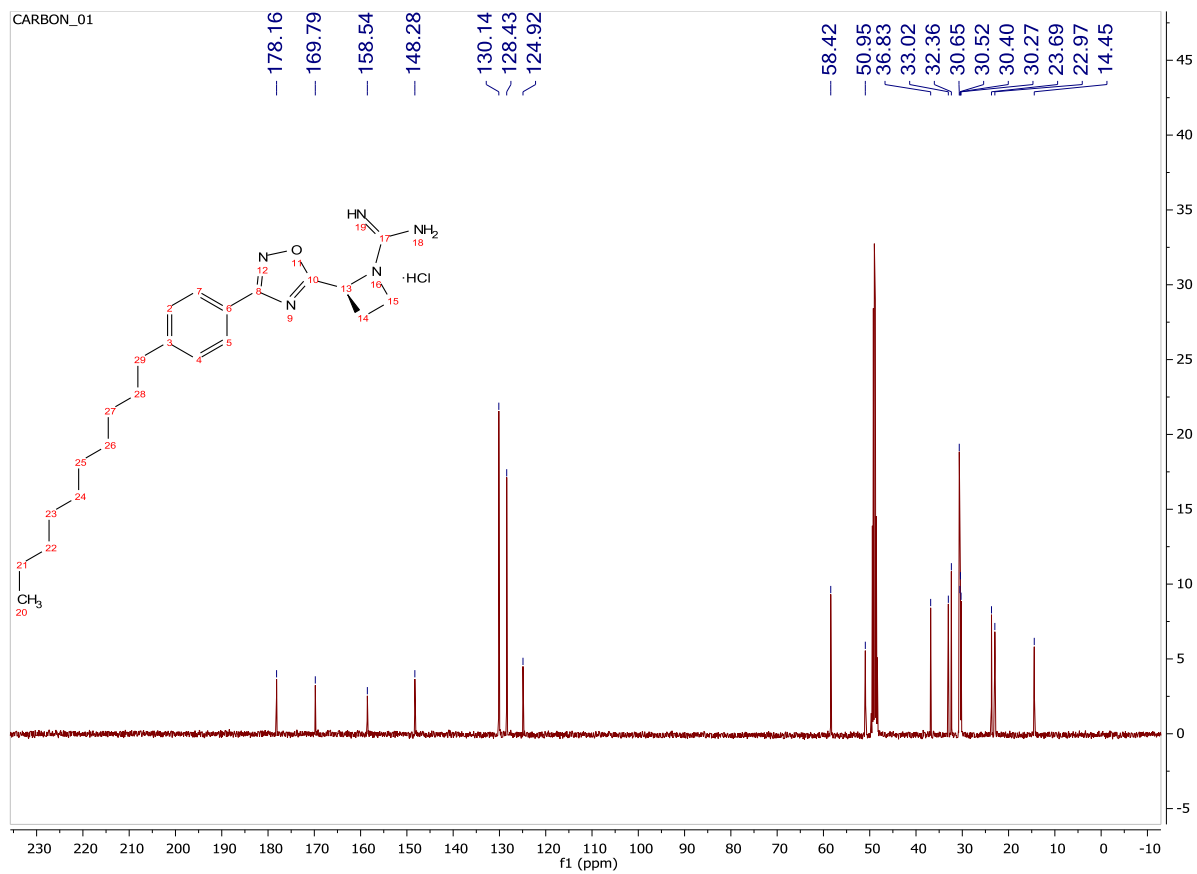

**10a: (S)-amino(2-(3-(4-(4-(3-methylbutanoyl)piperazin-1-yl)phenyl)-1,2,4-oxadiazol-5-yl)pyrrolidin-1-yl)methaniminium chloride**

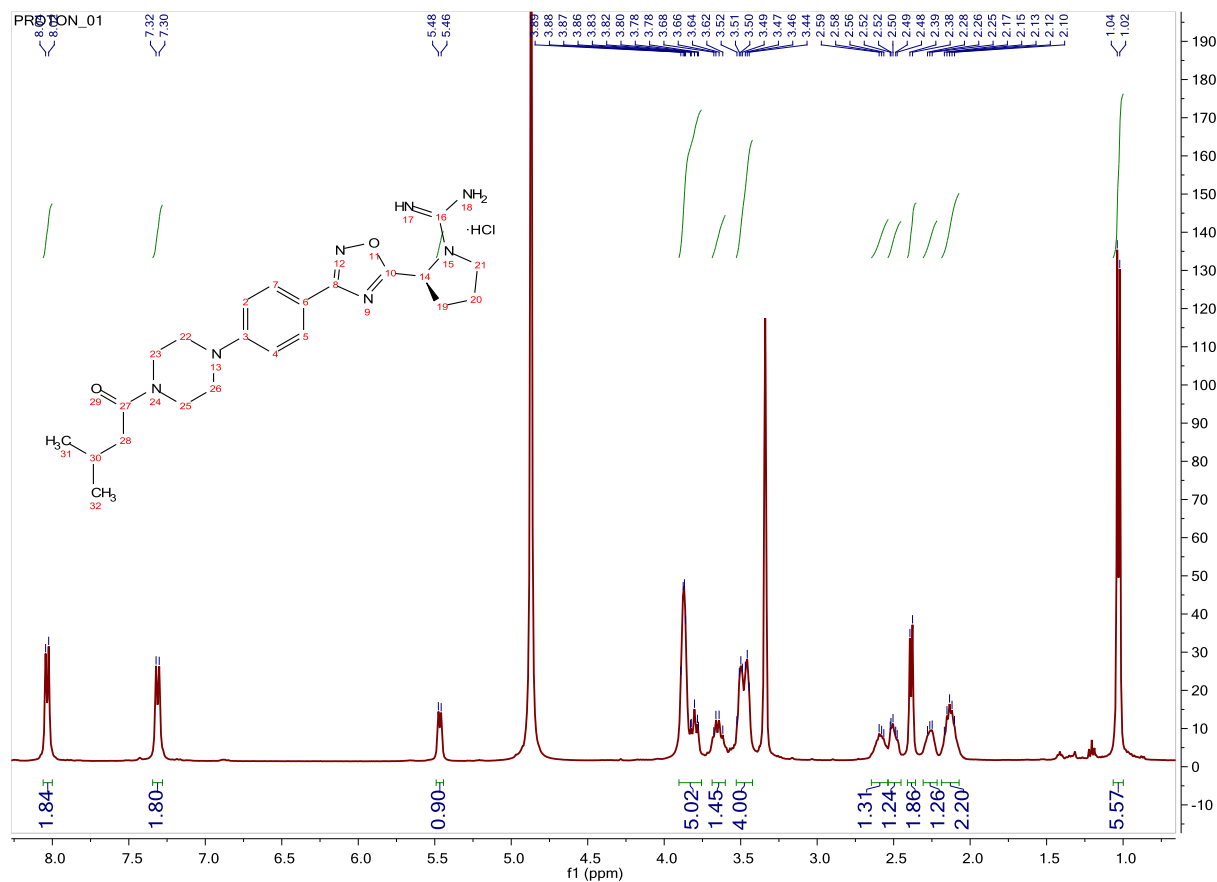

**10a: (S)-amino(2-(3-(4-(4-(3-methylbutanoyl)piperazin-1-yl)phenyl)-1,2,4-oxadiazol-5-yl)pyrrolidin-1-yl)methaniminium chloride**

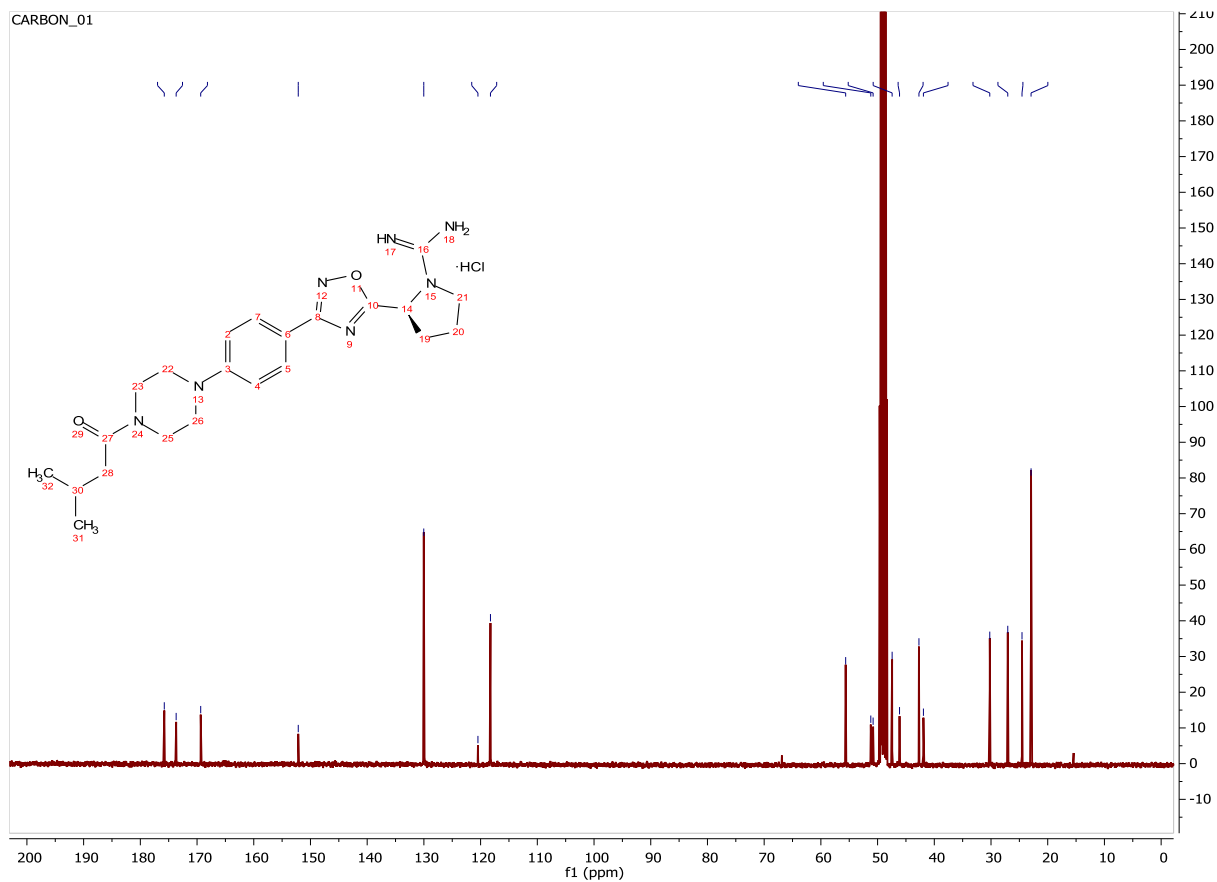



**10b:** ((S)-2-(3-(4-(4-((3r,5r,7r)-adamantane-1-carbonyl)piperazin-1-yl)phenyl)-1,2,4-oxadiazol-5-yl)pyrrolidin-1-yl)(amino)methaniminium chloride

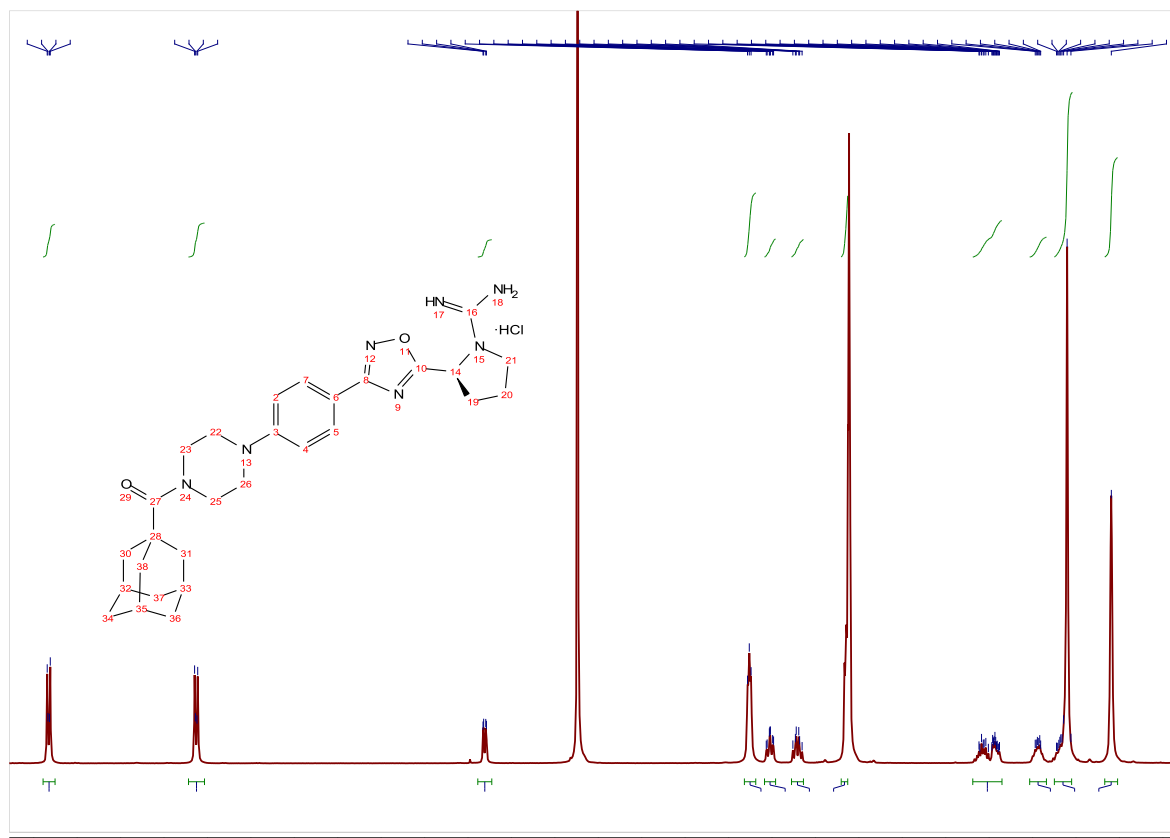

**10b: ((S)-2-(3-(4-(4-((3r,5r,7r)-adamantane-1-carbonyl)piperazin-1-yl)phenyl)-1,2,4-oxadiazol-5-yl)pyrrolidin-1-yl)(amino)methaniminium chloride**

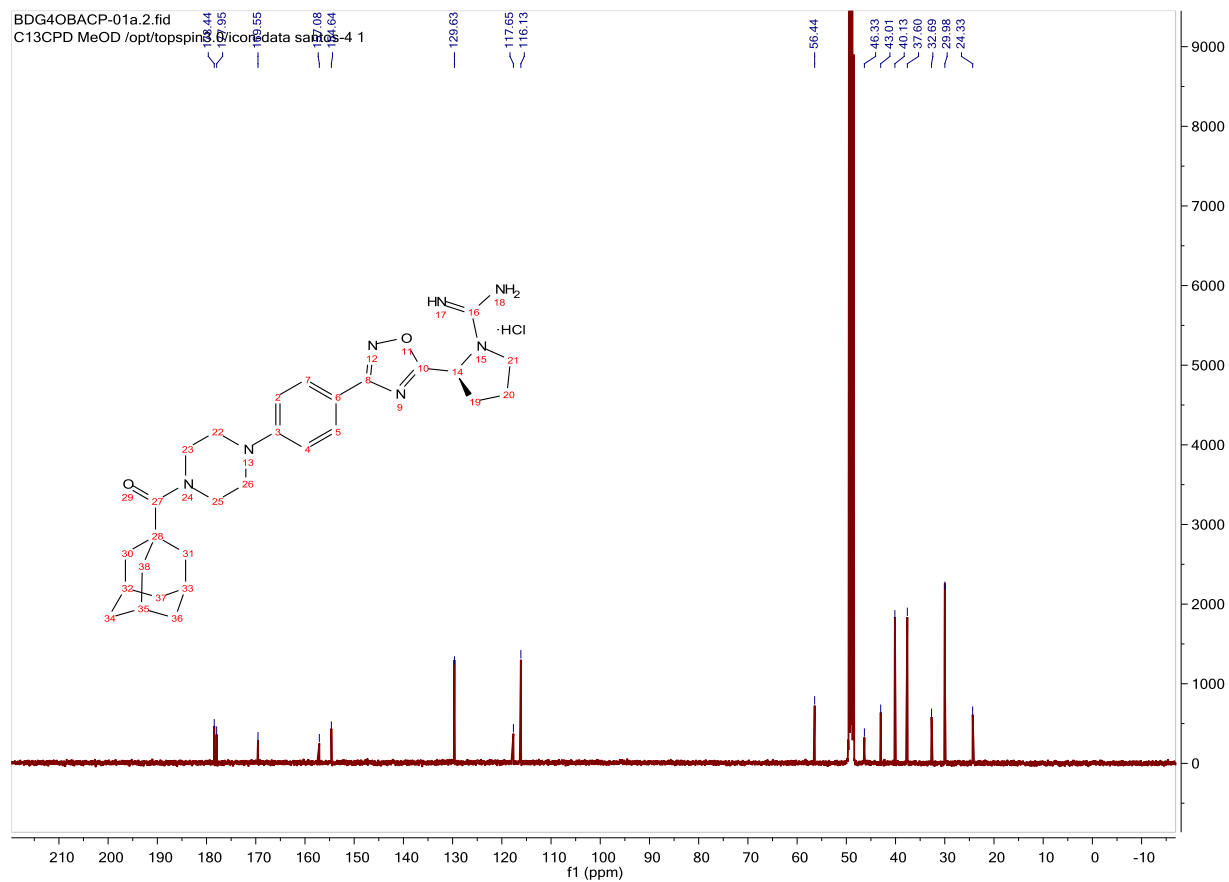

**10c:** (S)-amino(2-(3-(4-(4-(2-phenylacetyl)piperazin-1-yl)phenyl)-1,2,4-oxadiazol-5-yl)pyrrolidin-1-yl)methaniminium chloride

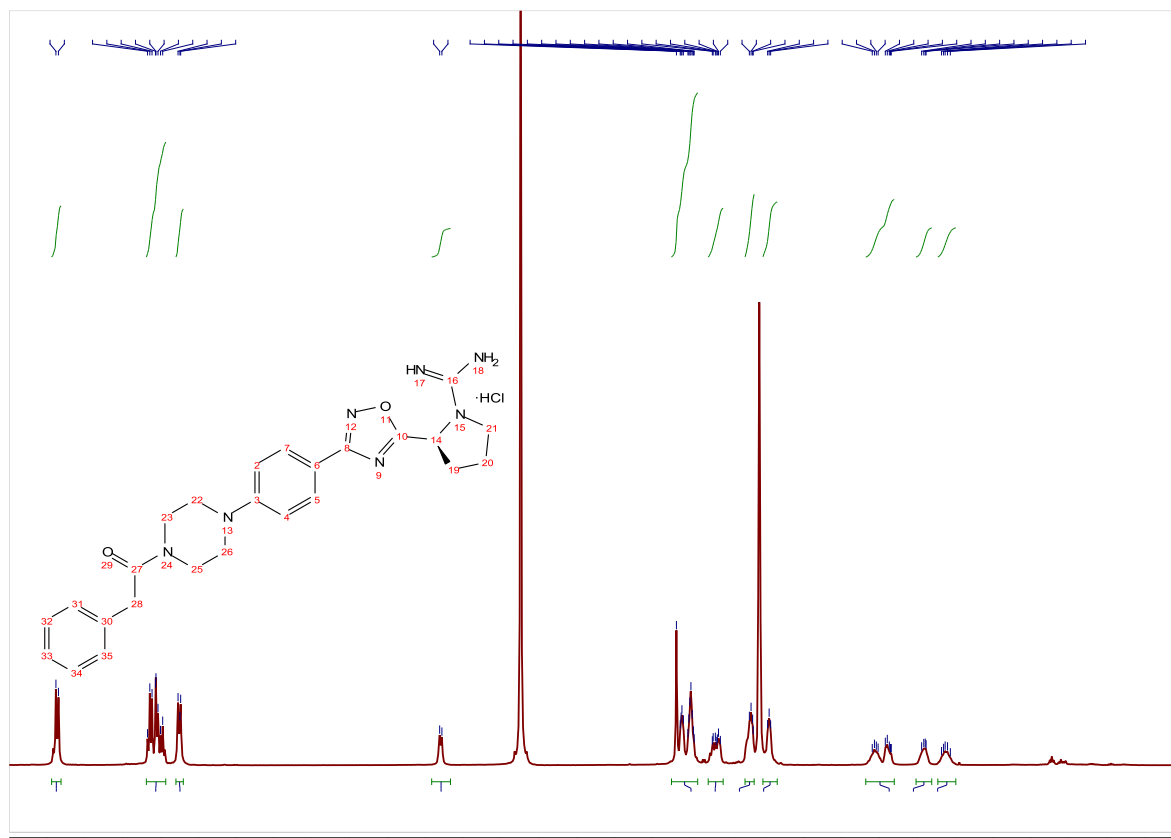

**10c: (S)-amino(2-(3-(4-(4-(2-phenylacetyl)piperazin-1-yl)phenyl)-1,2,4-oxadiazol-5-yl)pyrrolidin-1-yl)methaniminium chloride**

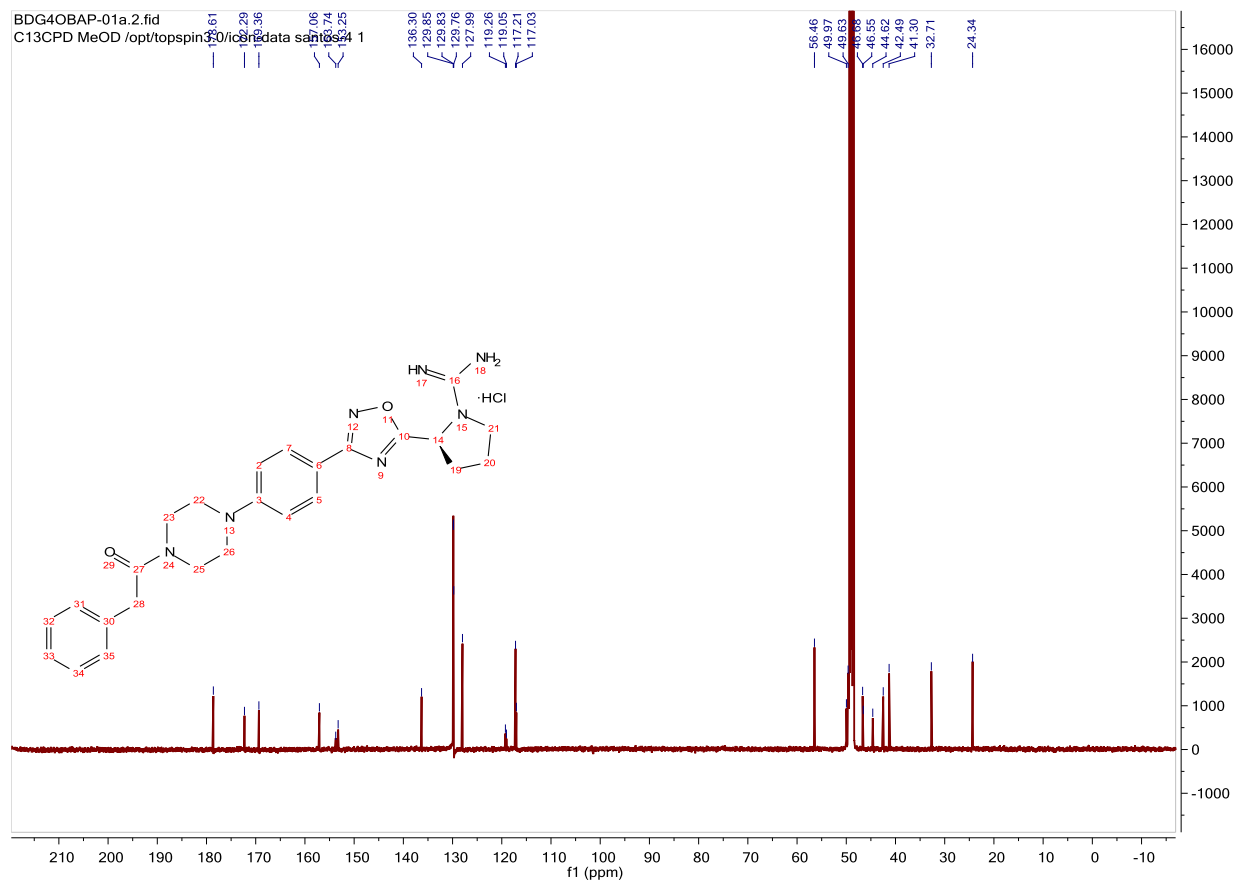

**10d: (S)-4-(4-(5-(1-(amino(iminio)methyl)azetidin-2-yl)-1,2,4-oxadiazol-3-yl)phenyl)-1-benzylpiperazin-1-ium chloride**

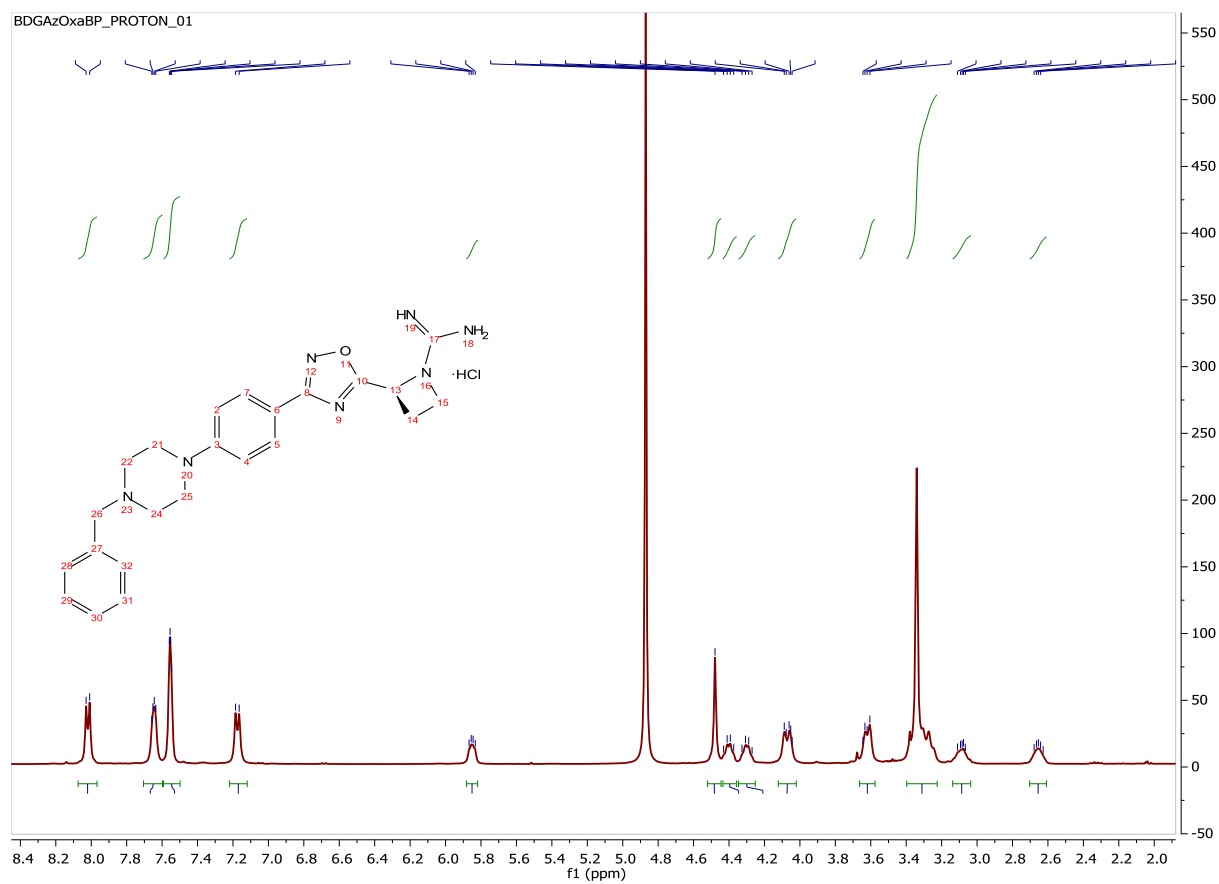

**10d: (S)-4-(4-(5-(1-(amino(iminio)methyl)azetidin-2-yl)-1,2,4-oxadiazol-3-yl)phenyl)-1-benzylpiperazin-1-ium chloride**

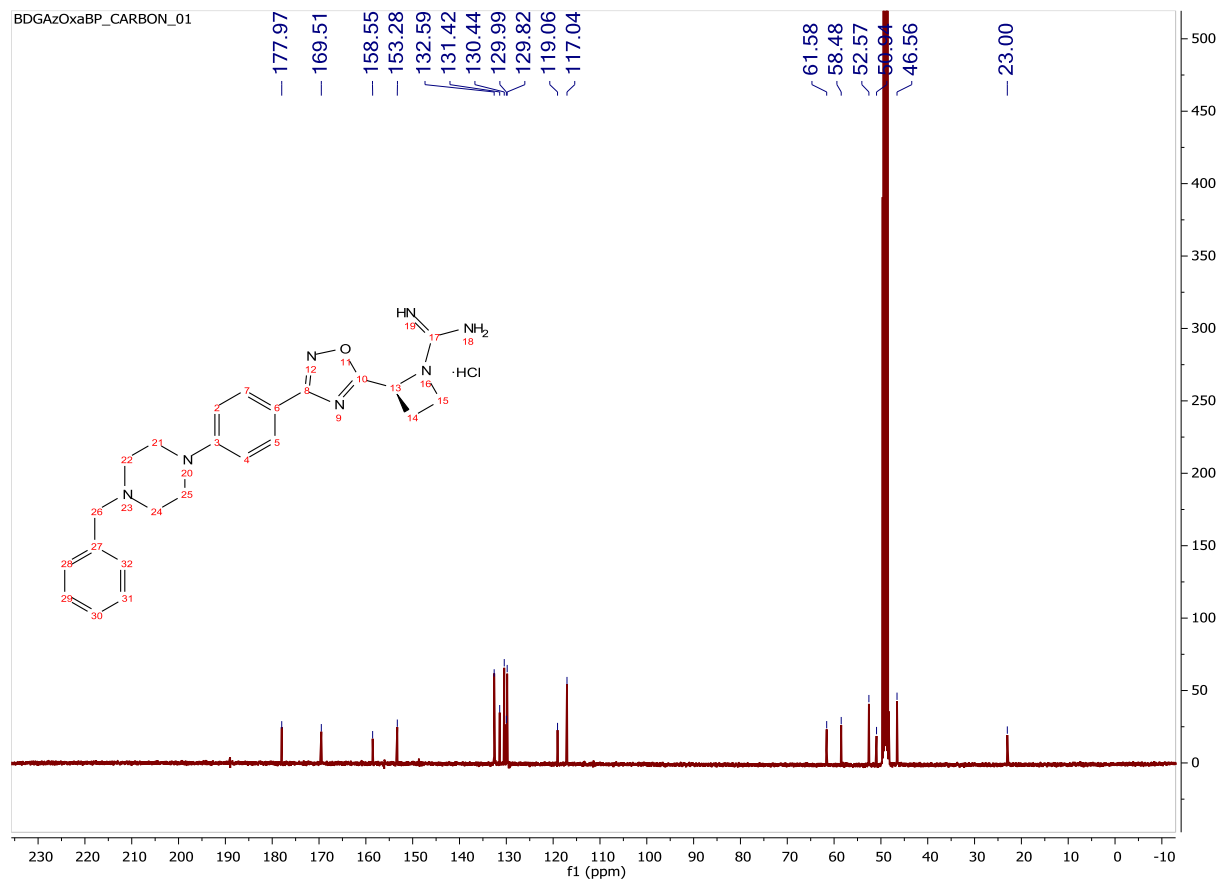

**14: (S)-amino(2-(3-(4-(3-(ethoxymethyl)-5-methylbenzyl)phenyl)-1,2,4-oxadiazol-5-yl)pyrrolidin-1-yl)methaniminium chloride**

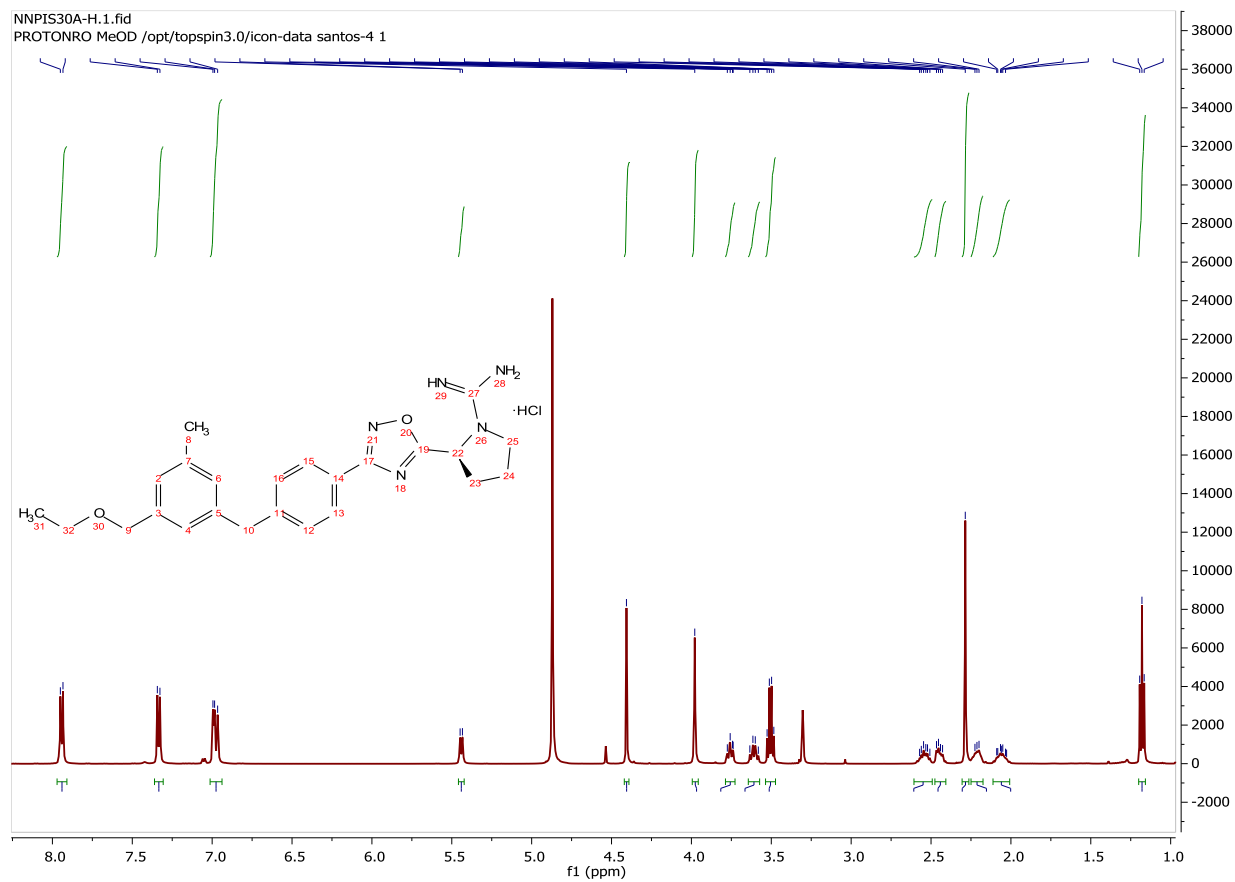

**14: (S)-amino(2-(3-(4-(3-(ethoxymethyl)-5-methylbenzyl)phenyl)-1,2,4-oxadiazol-5-yl)pyrrolidin-1-yl)methaniminium chloride**

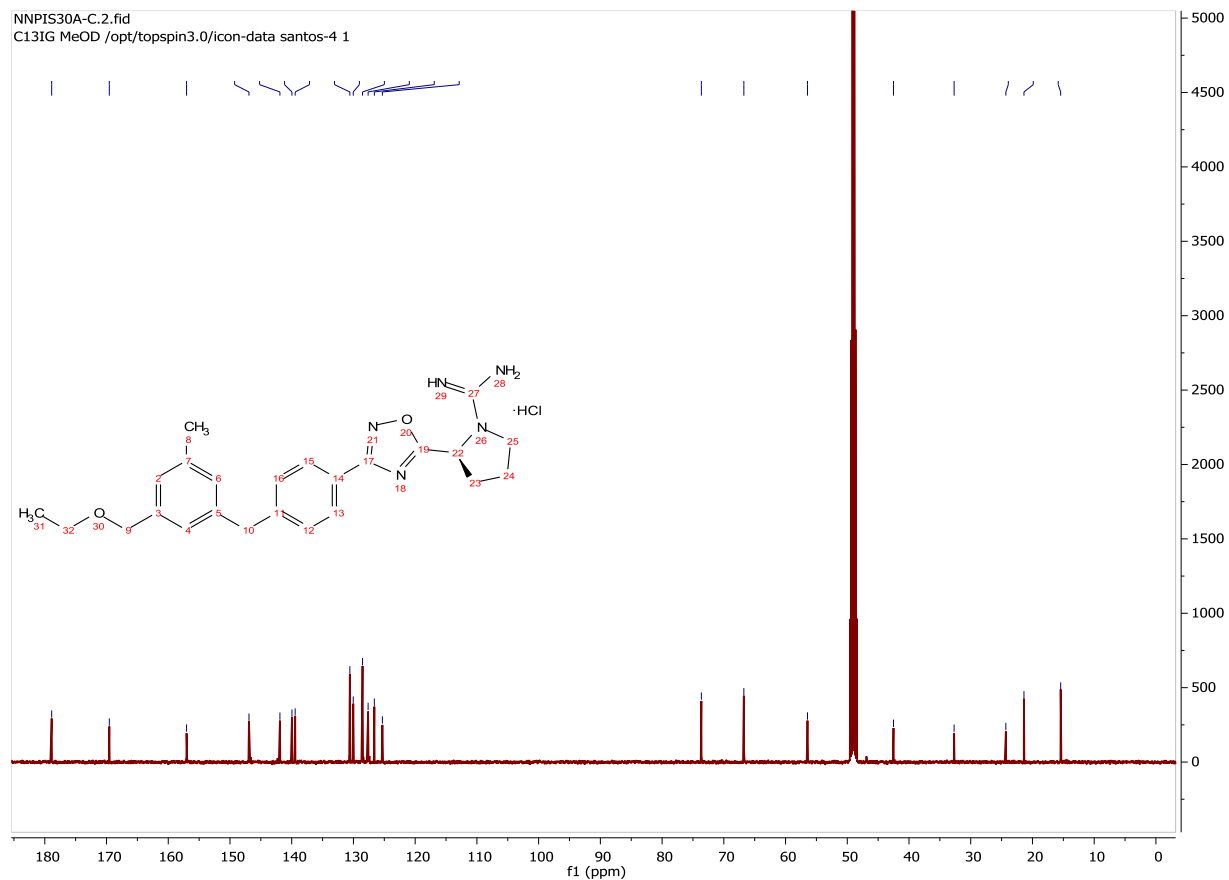



**17: (S)-amino-(2-(3-(4-((phenylsulfonyl)methyl)phenyl)-1,2,4-oxadiazol-5-yl)pyrrolidin-1-yl)methaniminium chloride**

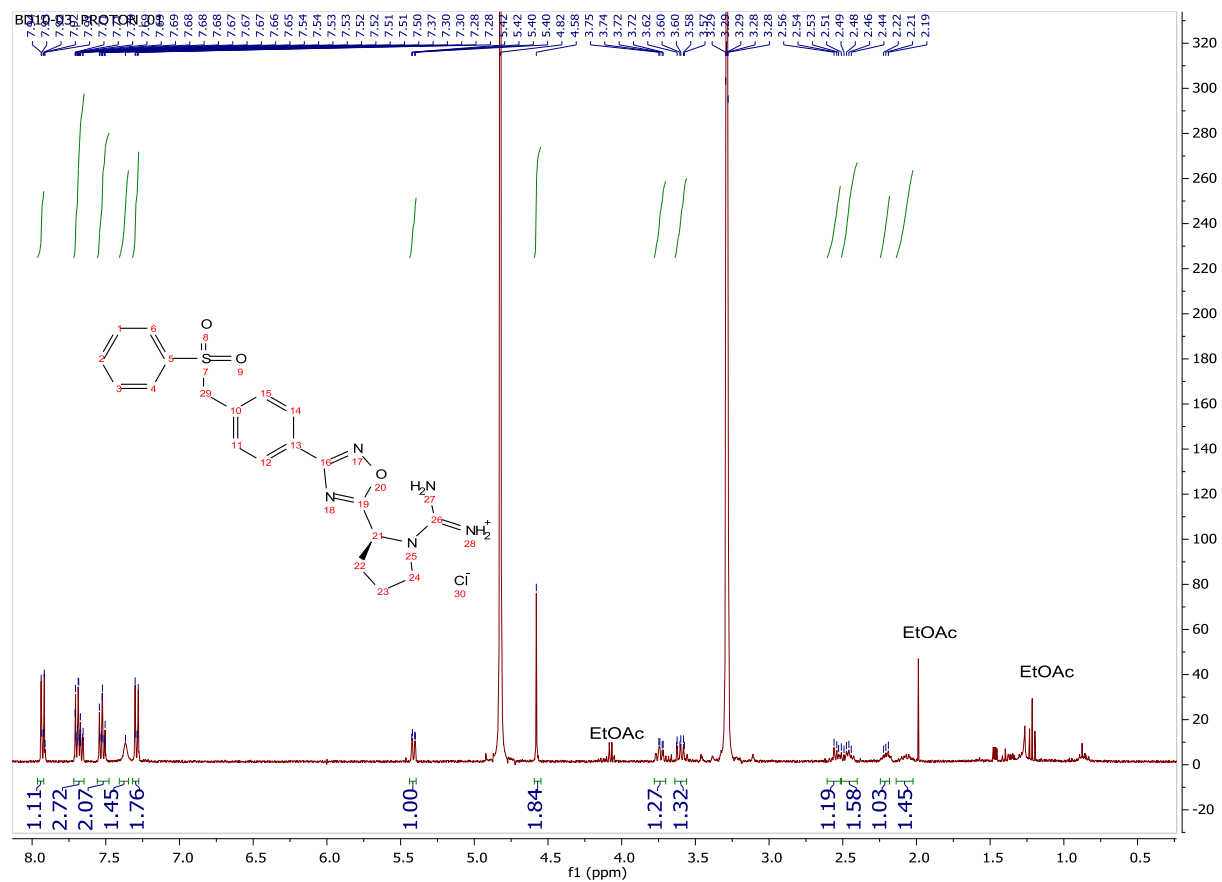

# 17: (S)-amino-(2-(3-(4-((phenylsulfonyl)methyl)phenyl)-1,2,4-oxadiazol-5-yl)pyrrolidin-1-yl)methaniminium chloride

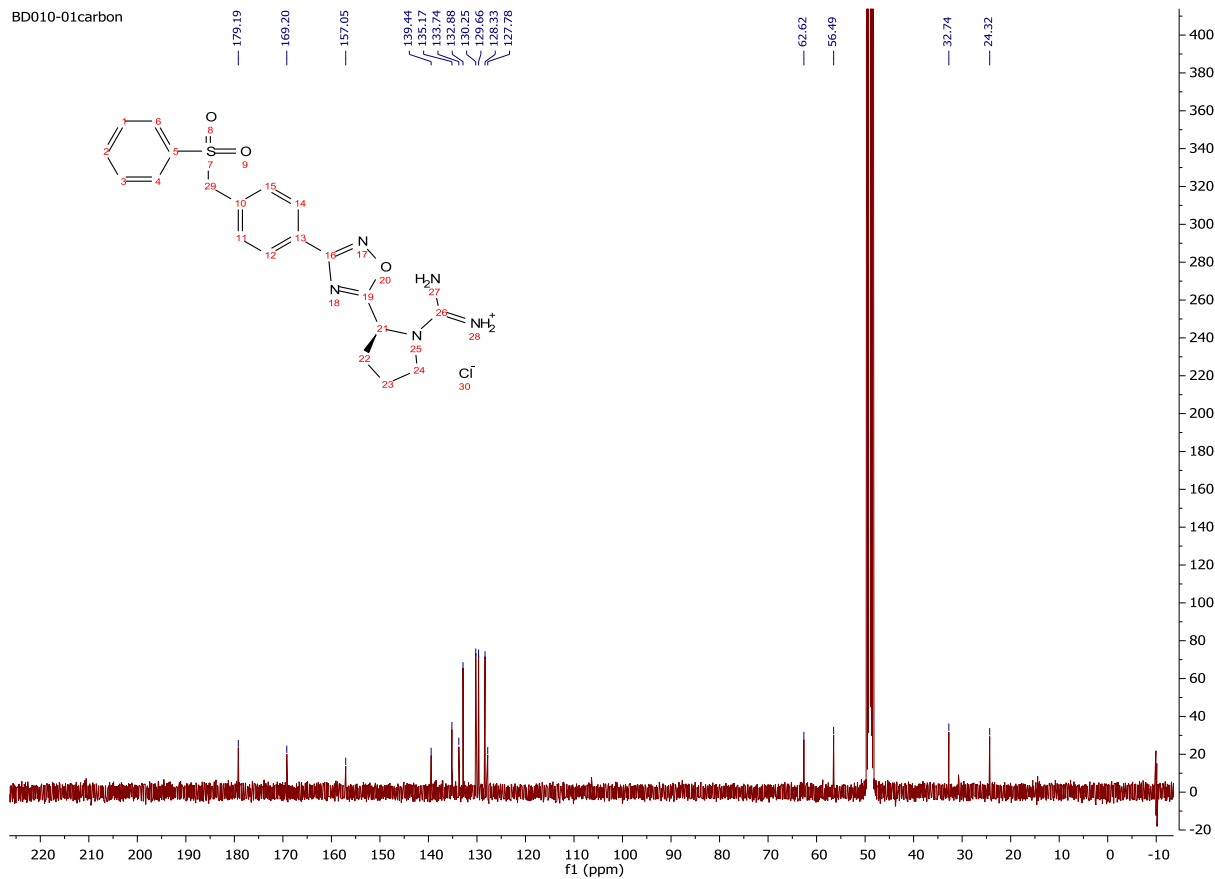

**22a: (S)-amino(2-(3-octyl-1,2,4-oxadiazol-5-yl)pyrrolidin-1-yl)methaniminium chloride**

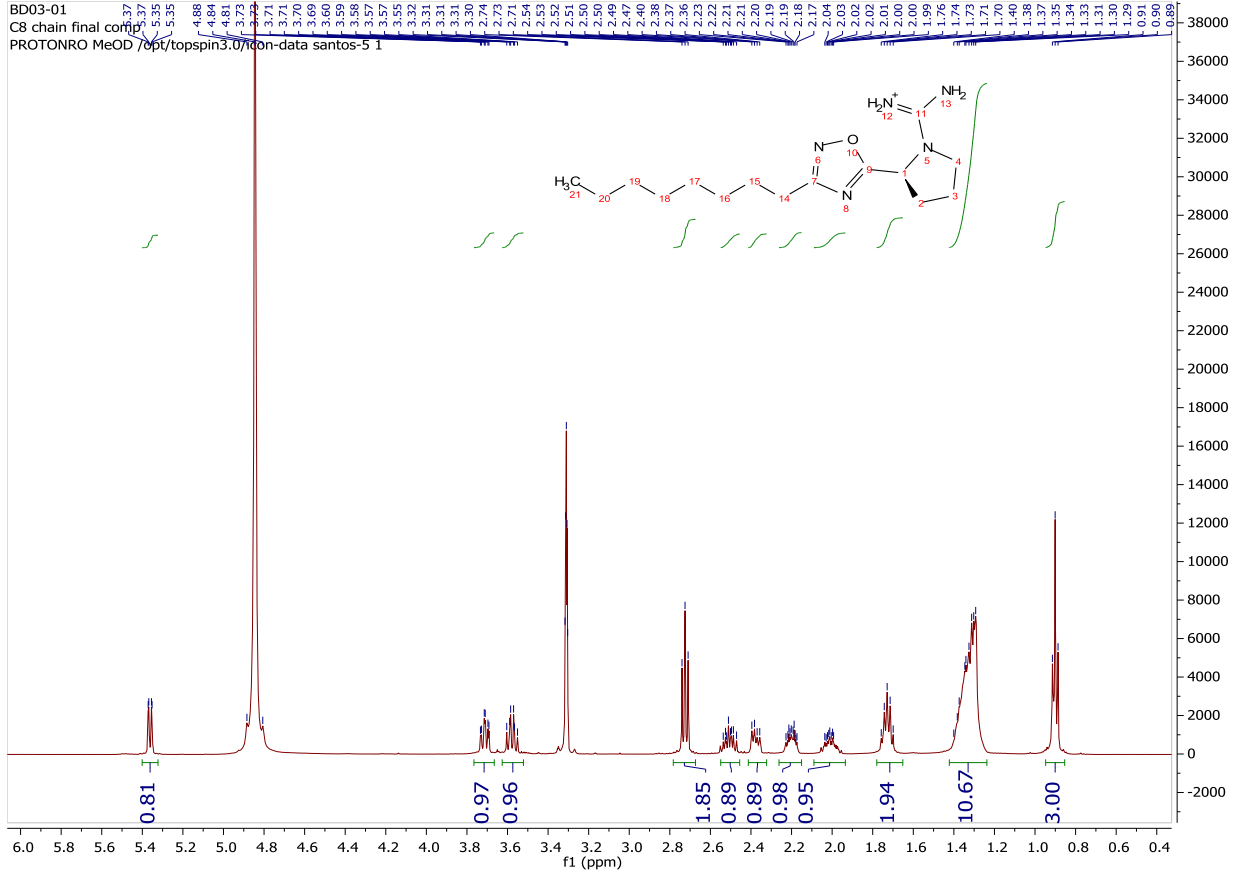

# 22a: (S)-amino(2-(3-octyl-1,2,4-oxadiazol-5-yl)pyrrolidin-1-yl)methaniminium chloride

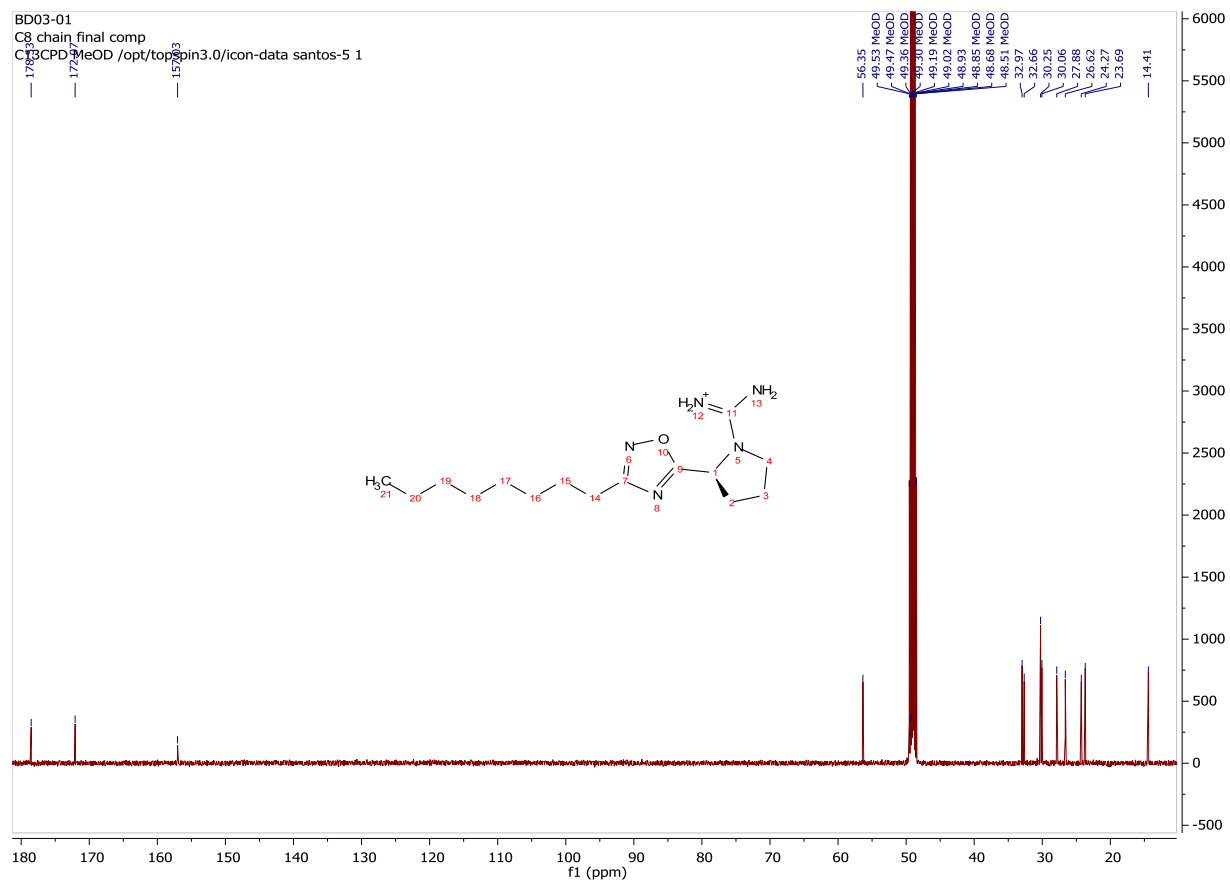

# 22b: (S)-amino(2-(3-dodecyl-1,2,4-oxadiazol-5-yl)pyrrolidin-1-yl)methaniminium chloride

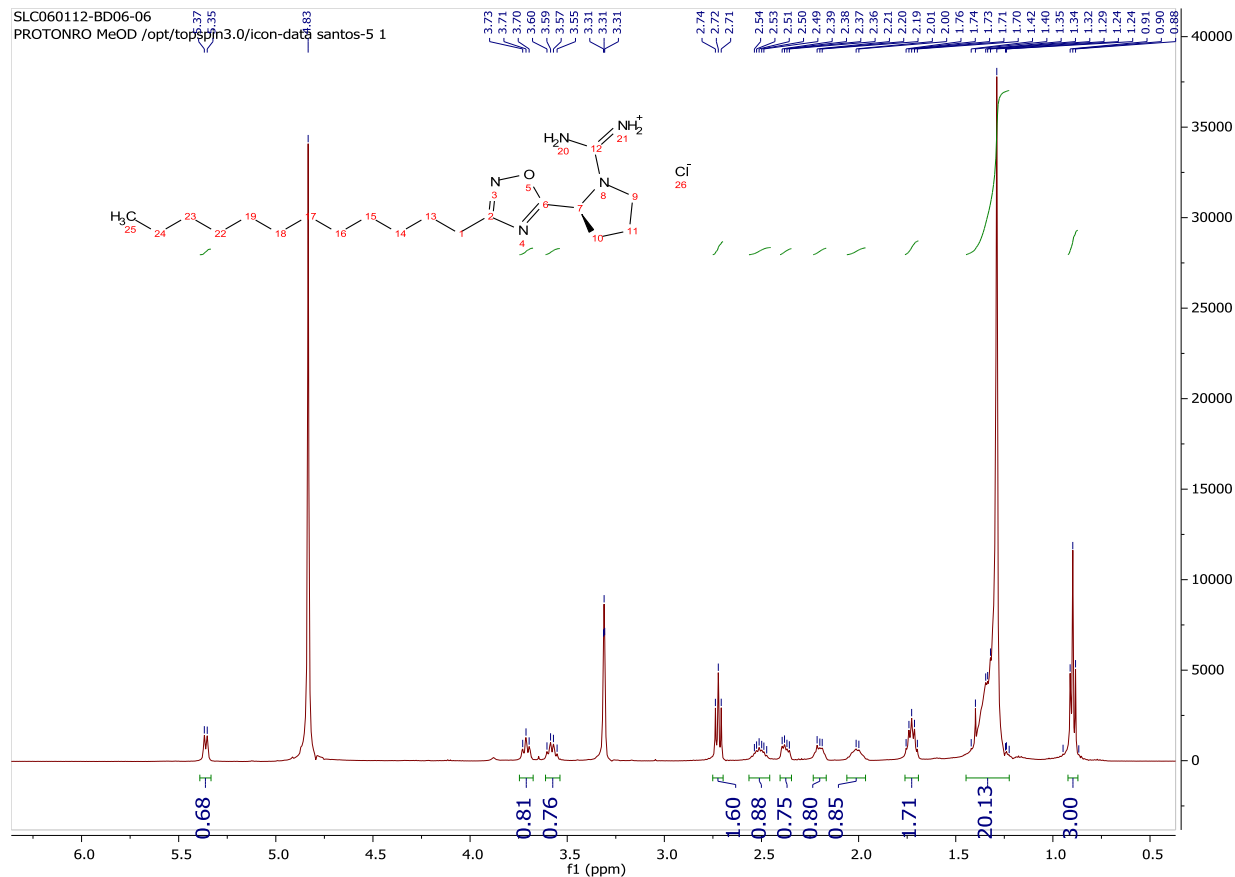

## 22b: (S)-amino(2-(3-dodecyl-1,2,4-oxadiazol-5-yl)pyrrolidin-1-yl)methaniminium chloride

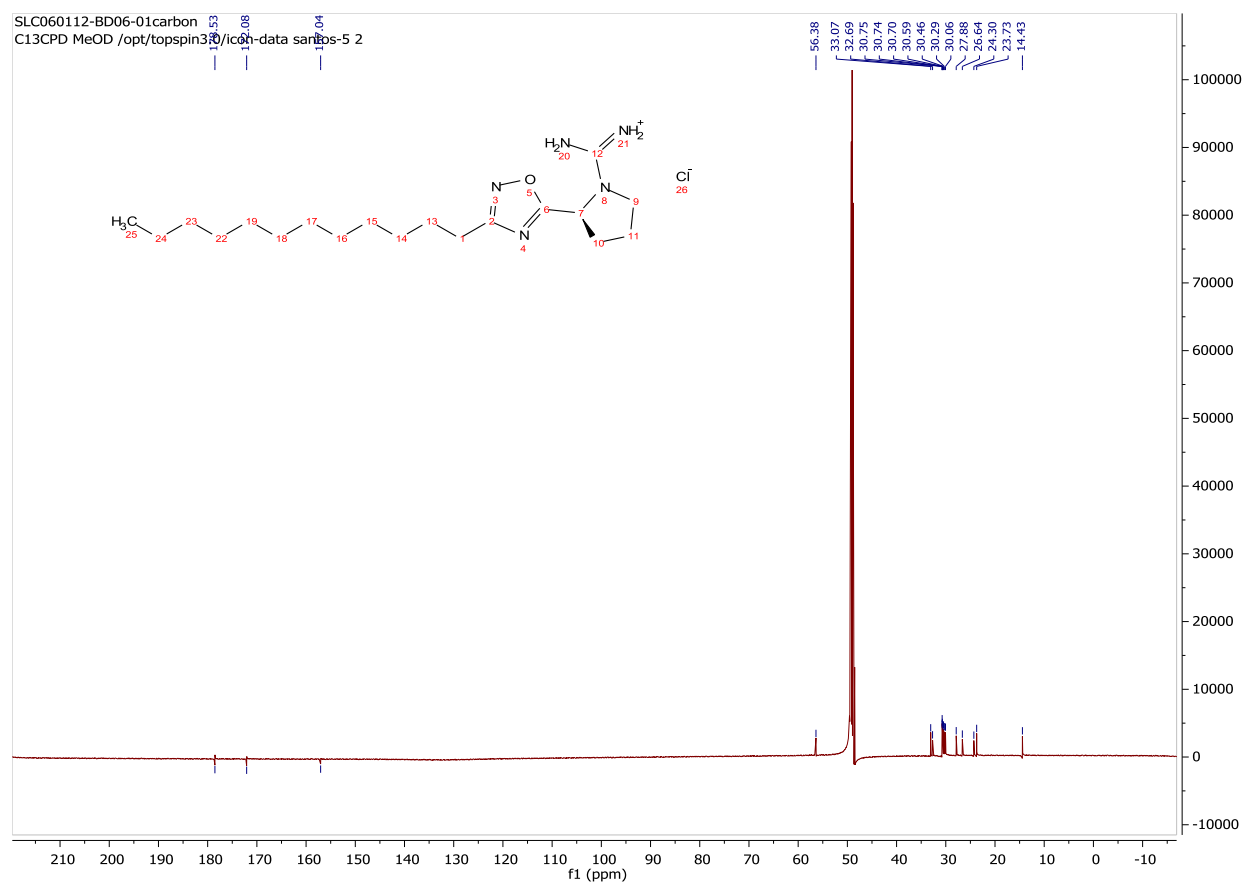

# 22c: (S)-amino(2-(3-hexadecyl-1,2,4-oxadiazol-5-yl)pyrrolidin-1-yl)methaniminium chloride

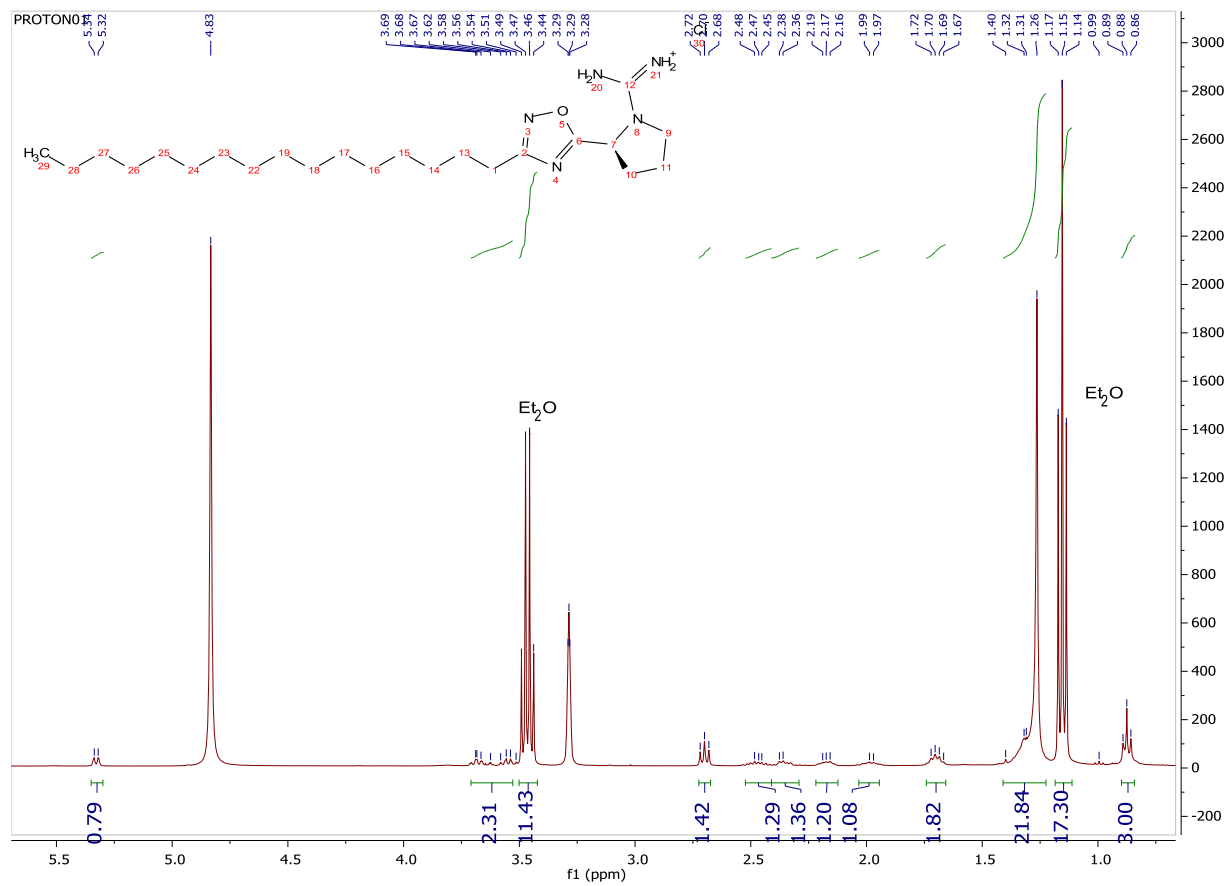

## 22c: (S)-amino(2-(3-hexadecyl-1,2,4-oxadiazol-5-yl)pyrrolidin-1-yl)methaniminium chloride

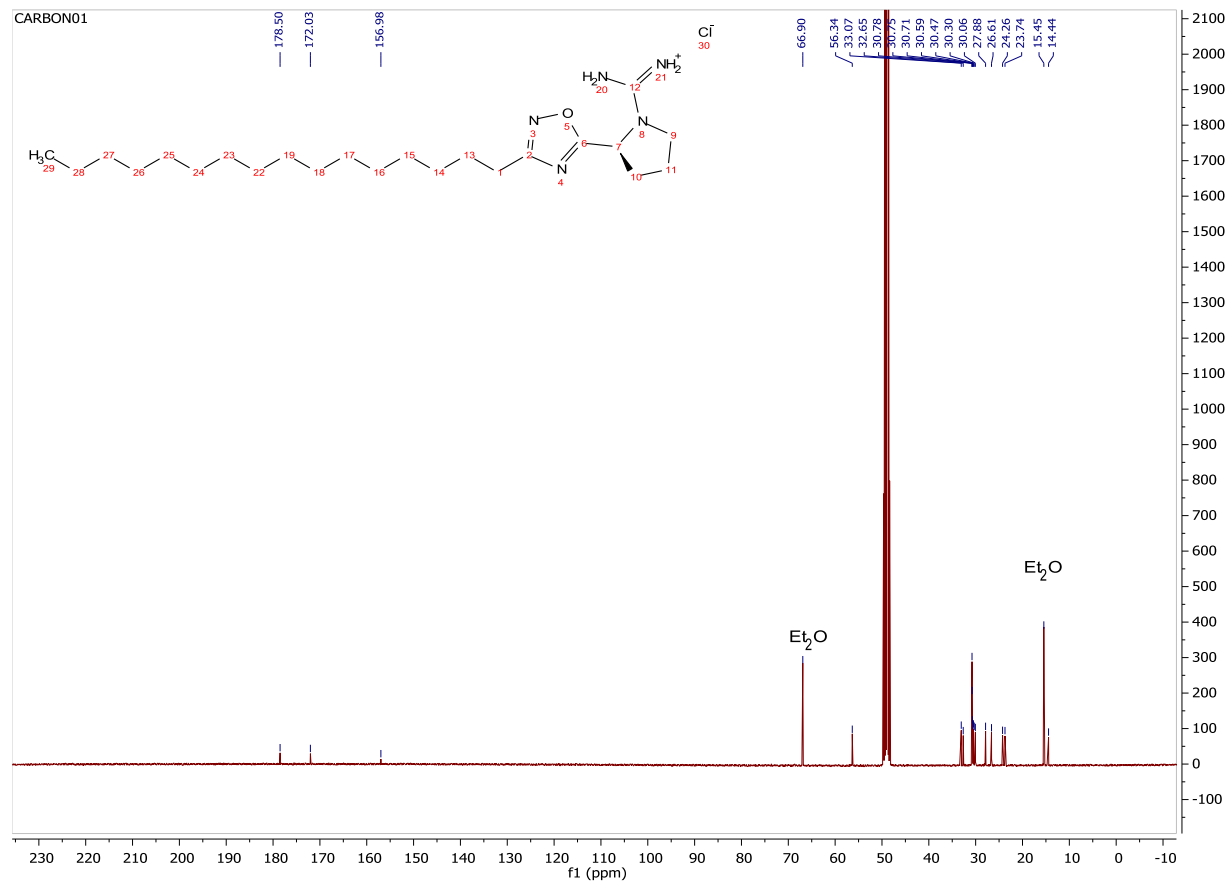

Supplement: NIHMS674693-supplement-supporting_info.pdf [file NIHMS674693-supplement-supporting_info.pdf]
